# Supplementary material
Source: PubMed Central journal article supplement (PMC4119271)
Supplement: mmc7.pdf [file mmc7.pdf]

## Article

## A G-Protein Subunit Translocation Embedded Network Motif Underlies GPCR Regulation of Calcium Oscillations

Lopamudra Giri,<sup>1</sup> Anilkumar K. Patel,<sup>2</sup> W. K. Ajith Karunarathne,<sup>1</sup> Vani Kalyanaraman,<sup>1</sup> K. V. Venkatesh,<sup>2,\*</sup> and N. Gautam<sup>1,3,\*</sup>

<sup>1</sup>Department of Anesthesiology, Washington University School of Medicine, St. Louis, Missouri; <sup>2</sup>Department of Chemical Engineering, Indian Institute of Technology Bombay, Mumbai, India; and <sup>3</sup>Department of Genetics, Washington University School of Medicine, St. Louis, Missouri

**ABSTRACT** G-protein  $\beta\gamma$  subunits translocate reversibly from the plasma membrane to internal membranes on receptor activation. Translocation rates differ depending on the  $\gamma$  subunit type. There is limited understanding of the role of the differential rates of  $G_{\beta\gamma}$  translocation in modulating signaling dynamics in a cell. Bifurcation analysis of the calcium oscillatory network structure predicts that the translocation rate of a signaling protein can regulate the damping of system oscillation. Here, we examined whether the  $G_{\beta\gamma}$  translocation rate regulates calcium oscillations induced by G-protein-coupled receptor activation. Oscillations in HeLa cells expressing  $\gamma$  subunit types with different translocation rates were imaged and quantitated. The results show that differential  $G_{\beta\gamma}$  translocation rates can underlie the diversity in damping characteristics of calcium oscillations among cells. Mathematical modeling shows that a translocation embedded motif regulates damping of G-protein-mediated calcium oscillations consistent with experimental data. The current study indicates that such a motif may act as a tuning mechanism to design oscillations with varying damping patterns by using intracellular translocation of a signaling component.

### INTRODUCTION

The concentration of cytoplasmic calcium ions is known to change with specific patterns of periodicity in response to a variety of stimuli. These oscillations are thought to constitute an essential part of information processing involved in cell signaling (1,2). Calcium oscillations play a crucial role in regulating cellular functions such as secretion and contraction (3,4). Activation of G-protein-coupled receptors (GPCRs) is known to trigger calcium oscillations (5,6). It has been suggested that both amplitude and temporal characteristics of calcium spiking encode signaling information (1,7,8). Various attempts have been made to understand such oscillatory behavior, using both mathematical modeling and experimental studies (6,9–12).

Although interplay between a fast positive and a slow negative feedback has been identified as one of the key motifs mediating these oscillations (9–11), the molecular mechanisms involved in tuning oscillation characteristics have not been fully identified. For instance, it is unclear how, in the presence of a continuous stimulus, postactivation oscillations shift to a damped response, eventually tapering off. Furthermore, there is limited information about mechanisms that are at the basis of cell-to-cell variability in calcium oscillation behavior. Because  $\beta\gamma$ -mediated phospholipase C- $\beta$  (PLC- $\beta$ ) activation is a primary event in

Gi-mediated calcium oscillations (13), we investigated whether the receptor stimulated translocation of the  $\beta\gamma$  complex between the plasma membrane and internal membranes plays a role in modulating these oscillations.

On activation by extracellular signals, heterotrimeric G-proteins were thought to be localized to the plasma membrane. However, more recent evidence suggests that on activation, G-protein  $\beta\gamma$  subunit types translocate from the plasma membrane to intracellular membranes at differential rates (14,15). The rate of translocation of different  $\beta\gamma$  types varies, depending on the affinity of the  $\gamma$  subunit for membranes (16). There is however, limited knowledge about the role that this translocation plays in regulating signaling network properties and cellular functions.

To study the role of a translocation module in a calcium oscillatory network, we developed an ODE (ordinary differential equation) mathematical model of an oscillatory circuit, with and without reversible translocation of the principal signaling component. Dynamical analysis of the network suggested that translocation can influence oscillation characteristics. Our studies on  $\alpha 2$  adrenergic receptor ( $\alpha 2AR$ )-induced calcium oscillations in HeLa cells provide experimental support for such a prediction. The ability to introduce  $\gamma$  subunit types or knockdown a specific  $\gamma$  subunit type in a cell allowed the proportion of fast versus slow translocating subunit types to be varied in these cells. The results suggested a role for differential translocation rates in tuning the damping of receptor-mediated calcium oscillations.

Because most cells express multiple  $\gamma$  subunits types (15), a two subunit model (slow and fast translocating) of

Submitted September 11, 2013, and accepted for publication May 13, 2014.

\*Correspondence: [gautam@wustl.edu](mailto:gautam@wustl.edu) or [venks@iitb.ac.in](mailto:venks@iitb.ac.in)

Anilkumar K. Patel and W. K. Ajith Karunarathne contributed equally to this work.

Editor: Edda Klipp.

© 2014 by the Biophysical Society  
0006-3495/14/07/0242/13 \$2.00

<http://dx.doi.org/10.1016/j.bpj.2014.05.020>

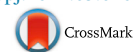

G $\alpha$ i-mediated calcium oscillations was developed through incorporation of  $\gamma$  subunits with different translocation rates. The model was also used to predict cell-to-cell heterogeneity in a population by invoking parametric distribution. Our model captured the experimentally observed statistical distribution of oscillation characteristics in a cell population and indicated that the relative proportion of differentially translocating  $\gamma$  subunits can play a role in regulating cell-to-cell variability in calcium oscillations.

## MATERIALS AND METHODS

### Mathematical modeling and simulation

We used an ODE model and bifurcation and Eigenvalue analysis to identify the role of translocation of a component in calcium oscillation circuit. Furthermore, we constructed another model with two  $\gamma$  subunits (two subunit model) to capture the role of spatiotemporal modulation of G $\beta\gamma$  in regulating calcium oscillations. Mainly, we used kinetics of reactions and transportation of signaling components, to develop a system of ODEs. The set of ODEs were solved using the subroutine ode23s in MATLAB (The MathWorks, Natick, MA) to obtain the simulated time course of calcium oscillations. Eigenvalue analysis was performed to characterize the damping and frequency of oscillations.

### Cell culture and transfection

HeLa cells were cultured in MEM medium (Cellgro, Manassas, VA) supplemented with 10% dialyzed fetal bovine serum (Atlanta Biologicals, Flowery Branch, GA) and antibiotics.  $0.2 \times 10^6$  cells were seeded on 29 mm glass bottom dishes (In Vitro Scientific, Sunnyvale, CA) and maintained in culture until 70–80% confluency. All transfections were performed using 2  $\mu$ l Lipofectamine 2000 per dish (Invitrogen, Life Technologies, Grand Island, NY) as per manufacturer's protocol.

### Constructs, small hairpin RNA (shRNA), and cell lines

HeLa cells (ATCC, Manassas, VA) were transfected with mCherry tagged fast ( $\gamma$ 11) and slow ( $\gamma$ 3) translocating  $\gamma$  subunit (15). The  $\gamma$ 11-3 chimera was made by substitution of the last 9 amino acids of the C-terminus of  $\gamma$ 11 with those of  $\gamma$ 3. PH-mCh (17) was used to detect inositol trisphosphate (IP3) production during Gi activation in HeLa cells. A  $\gamma$ 11 knockdown stable HeLa cell line was used where  $\gamma$ 11 was knocked down using shRNA in a lentivirus resulting in ~70–80% reduction of  $\gamma$ 11 expression (34). Another stable HeLa cell line was created using the non-Target shRNA control virus.

### Live cell imaging

Transfected cells on 29 mm glass bottom dishes were imaged using a Leica-Andor spinning disc confocal imaging system, which consists of an Andor FRAP-PA device and EM-CCD camera. To avoid anomalies due to confocal plane changes, an adaptive focus control was used. Imaging was performed using a 63X objective. Calcium imaging was performed in Hank's Balanced Salt Solution (HBSS) (Invitrogen, Life Technologies, Grand Island, NY). Cell cultures were loaded with 2  $\mu$ M Fluo-4 (Molecular Probes, Life Technologies, Grand Island, NY) for 30 min in HBSS. The cells were then washed with HBSS after which Fluo-4 images (Excitation: 488nm; Emission: 510 nm) were acquired at 2–3 s intervals at 37°C. Cells expressing mCh-tagged  $\gamma$ 11,  $\gamma$ 11-3, and  $\gamma$ 3 were selected by mCh fluorescence (Excitation: 595 nm; Emission: 610 nm). Norepinephrine (Sigma, St.

Louis, MO) in HBSS was used to activate the  $\alpha$ 2AR at different concentrations (in the range of 0.05–100  $\mu$ M).

### Image analysis and quantification of cell-to-cell variability in calcium oscillations

Time-lapse movies were acquired every 2–3 s, for 2 min before agonist addition and 15 min after agonist addition. Raw image data were analyzed with Andor software to obtain the time course of fluorescence levels in single cells. For a single cell, cytosolic calcium increase was measured by quantifying the fold change of the fluorescence level with respect to the basal level. For each single cell of a population, (size ~80–100 cells) the number of calcium spikes ( $N$ ) and the duration of calcium spiking ( $T$ ) was quantified using MATLAB (The MathWorks) and OriginPro 8.0 peak analyzer. Histograms of the previous parameters were obtained using a routine written in MATLAB.

### Statistical modeling and analysis

Assuming a Gamma distribution function in upstream activation, a MATLAB subroutine was written to simulate the calcium spiking characteristics in a cell population. The response for each single cell in the population is based on the two  $\gamma$  subunit ODE model. For comparison between the groups with different genotypes (for live cell imaging experiment and simulation), kernel-density function was fitted to the distribution of calcium oscillation characteristics using MATLAB.

## RESULTS

### Cell-to-cell variability in damping of calcium oscillations

Translocation of G $\beta\gamma$  between plasma membrane and internal membranes regulates the concentration of G $\beta\gamma$  at the plasma membrane. This can potentially have an effect on the activity of effectors downstream of G $\beta\gamma$ . Consistent with this notion, differential rates of translocation of different G $\beta\gamma$  subunits have distinct effects on the activation of PLC- $\beta$  and IP3 release at the plasma membrane (17). Because intracellular calcium release is mediated by IP3, we examined whether the translocation rate of G $\beta\gamma$  can influence cytosolic calcium oscillation characteristics.

First, we chose an experimental framework to investigate the effect of G-protein subunit translocation on receptor-mediated calcium oscillation. Activating endogenous  $\alpha$ 2AR with norepinephrine stimulated Gi-mediated calcium oscillations in HeLa cells (Fig. 1, *a*, *c*, and *e*). The oscillatory response was monitored by time lapse imaging of Fluo-4 intensity. Oscillations were inhibited by an antagonist, yohimbine (Fig. 1, *b*, *d*, and *f*). PLC $\beta$  activation and IP3 generation was confirmed through increase in the IP3 sensor PLC $\delta$ -PH-mCh (17) intensity in the cytosol and decrease at the plasma membrane (Fig. S1 in the Supporting Material). We found that cytosolic calcium release was abolished in HeLa cells in the presence of thapsigargin, a blocker of sarcoplasmic reticulum calcium-ATPase pump (Fig. S2 *a*). Additionally, we found that HeLa cells show calcium oscillations even without calcium in the medium

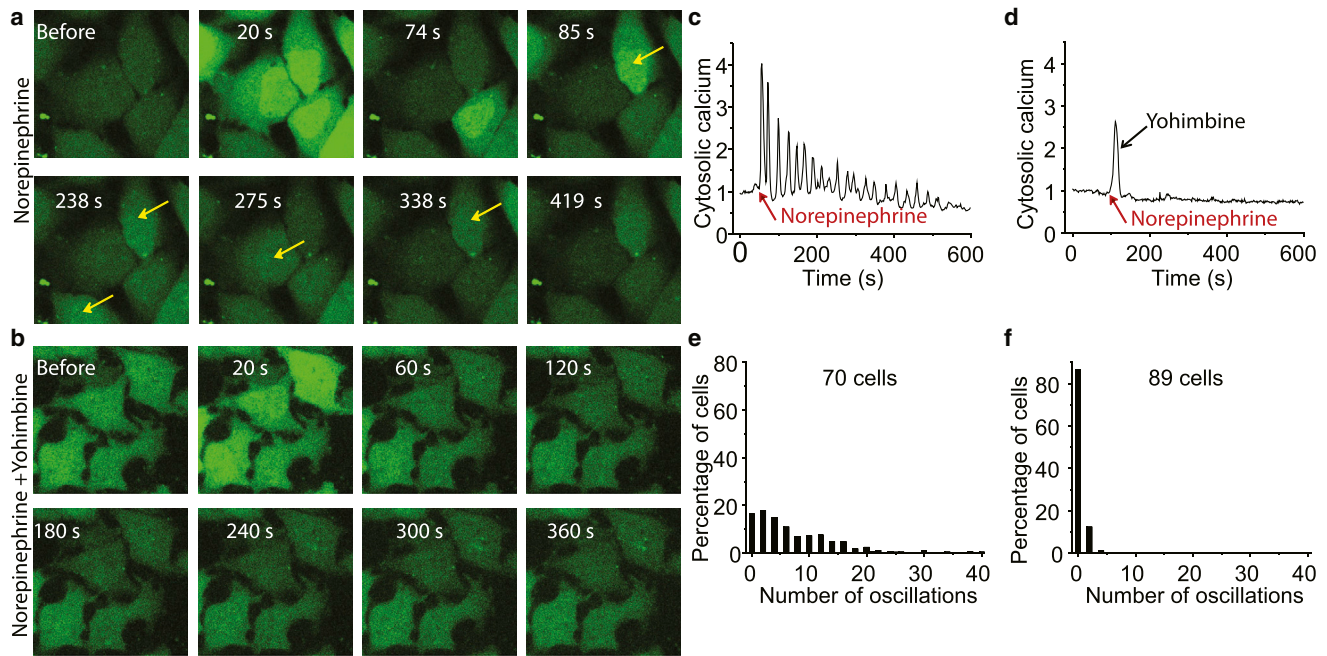

FIGURE 1 Calcium oscillation induced by  $\alpha 2AR$ . (a) Representative images of HeLa cells showing  $Ca^{2+}$  response in the continuous presence of norepinephrine (agonist, dose =  $100 \mu M$ ). (b) Representative HeLa cell showing  $Ca^{2+}$  response after addition of agonist (norepinephrine, dose =  $100 \mu M$ ) followed by antagonist (yohimbine, dose =  $50 \mu M$ ). Times shown are period elapsed after agonist addition. Antagonist was added at 25 s. Arrows point to cells that show increases in calcium over basal state cells. Cells exposed to antagonist do not show such an increase in any cell over basal state cells. (c) Time course of  $Ca^{2+}$  oscillations in the presence of norepinephrine in a single cell. Red arrow indicates addition of norepinephrine. (d) Time course of  $Ca^{2+}$  oscillations after addition of norepinephrine (red arrow) followed by yohimbine (black arrow). (e and f) Frequency distribution of the number of  $Ca^{2+}$  spikes in cells from (a and b). Number of independent experiments ( $N_{exp}$ ) = 5. To see this figure in color, go online.

(Fig. S2 b), which is consistent with observations reported in the literature (4). However, the frequency and amplitude is slightly different compared to cells in medium containing calcium. These results clearly show that the stimulation through norepinephrine induces intracellular calcium release in HeLa cells.

We analyzed calcium oscillations through quantification of the number of calcium spikes and duration of oscillations in single cells with norepinephrine. We performed a detailed dose response analysis of norepinephrine stimulated HeLa cells at concentrations ranging from  $0.005$  to  $200 \mu M$ . We found that cells showed calcium oscillations between  $0.5$  and  $100 \mu M$  and performed our experimental analysis within that range.

Oscillatory responses were grouped into three categories, low, medium, and high based on agonist concentration (Fig. 2, a–c). At low doses, most of the cells with limited spiking showed rapid damping (Fig. 2 a). The variability in dampening and number of spikes at medium and high dose was higher (see Fig. 2, b and c). Because calcium oscillations in a cell population showed a wide variation in spiking pattern when activated at a high dose, mean analysis was not suited for quantification of population behavior. Hence, cell-to-cell variability in calcium oscillations in populations of cells was measured by fitting probability density function to the frequency distribution of responses.

To categorize the oscillatory behavior in a cell population, cells exhibiting different numbers of calcium spikes and duration of oscillations were binned. The frequency distribution histograms indicate that with increasing doses, the population shifts from a lower number and duration of spiking toward a higher number and longer duration (Fig. 2, d and e). A nonparametric kernel density function fit to the previous probability distribution reemphasizes that oscillatory behavior is heterogeneous at high doses (Fig. 2, f and g).

### Calcium oscillations in cells with multiple G-protein $\gamma$ subunit types

We then examined the impact of different proportions of fast ( $\gamma_{fast}$ ) and slow ( $\gamma_{slow}$ ) translocating  $\gamma$  subunits on receptor stimulated calcium oscillation characteristics in HeLa cells. The quantitative real-time polymerase chain reaction profile of  $\gamma$  subunit types in HeLa cells revealed that they contain  $\gamma 5$ ,  $\gamma 10$ ,  $\gamma 11$ , and  $\gamma 12$  (15).  $\gamma 11$  is a rapidly translocating subunit ( $t_{1/2} \sim 10$  s), whereas the others are slower ( $t_{1/2} > 50$  s) (15,16).

Based on this, the fraction of  $\gamma_{fast}$  was varied by transfecting HeLa cells with the  $\gamma 11$  subunit. Similarly, to alter the fraction of  $\gamma_{slow}$ , HeLa cells were transfected with a  $\gamma 3$  subunit ( $t_{1/2} \sim 200$  s) (15,16). Additionally, to rule out the

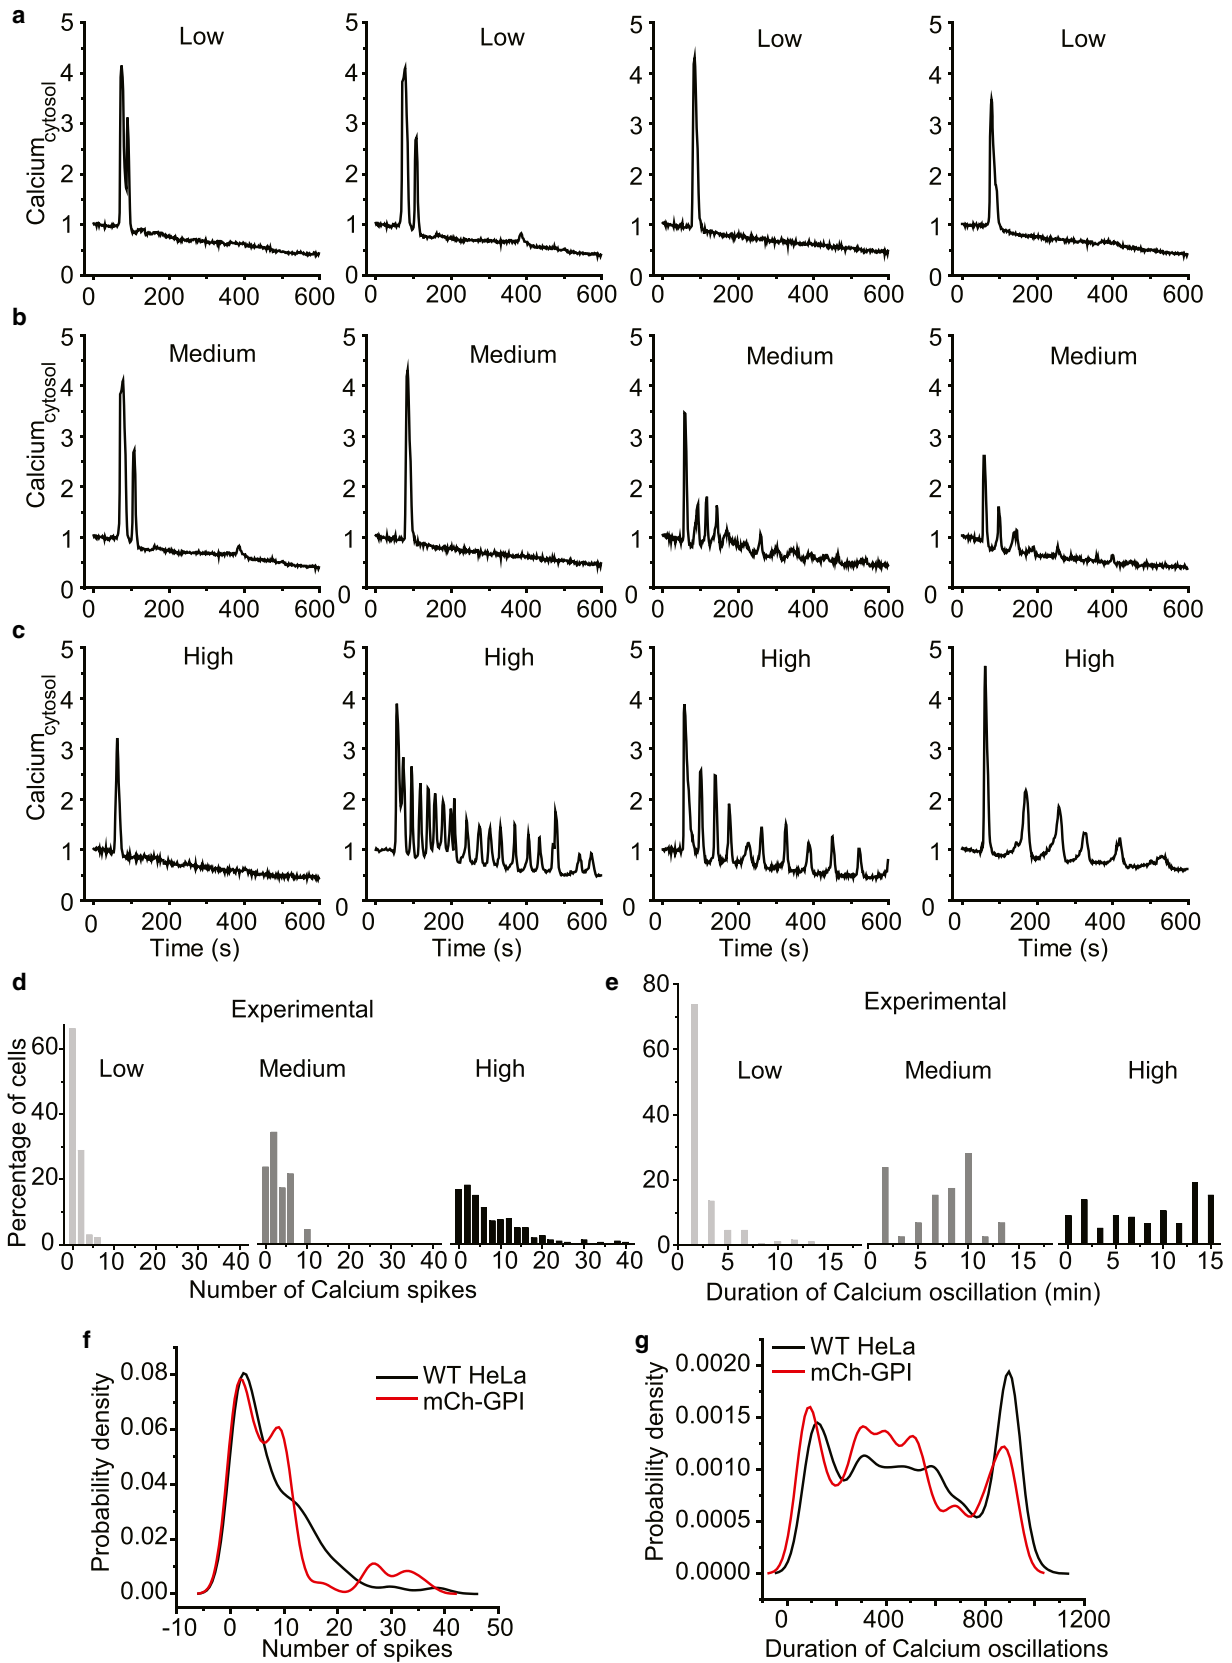

(legend on next page)

possibility that any differences in effects between  $\gamma 11$  and  $\gamma 3$  are not peculiar to the subunit types but reflect their translocation characteristics, we constructed a chimeric  $\gamma 11-3$  molecule by substituting the C-terminal domain of  $\gamma 11$  with the corresponding domain of the  $\gamma 3$  subunit. The C-terminal domain is known to determine translocation rates (14) and the comparison of translocation characteristics of chimeric  $\gamma 11-3$ ,  $\gamma 3$ , and  $\gamma 11$  shows that as anticipated,  $\gamma 11-3$  translocates similar to  $\gamma 3$  (Fig. S3 a). We first characterized the effect of agonist (norepinephrine) on the translocation rate of the  $\gamma$  subunit types and plotted the translocation profiles for overexpressed  $\gamma 11$  or  $\gamma 3$  (Fig. S3 c–e). Because we observed cell-to-cell variation in translocation rates, we performed a distribution analysis for  $\gamma 11$  and  $\gamma 3$  translocation rates at different agonist concentrations (Fig. S3 f).

Next, we performed live cell imaging of a cell population transfected with three different  $\gamma$  subunit types,  $\gamma 3$ ,  $\gamma 11$ , and  $\gamma 11-3$  (Movies S1–S3). Because a larger fraction of HeLa cells in a population showed an oscillatory response at a higher agonist concentration (Fig. 2, c–e), experiments were performed using 100  $\mu\text{M}$  norepinephrine. Although 100  $\mu\text{M}$  norepinephrine may appear to be a relatively high concentration, there is little information about the actual effective physiological concentrations that a receptor senses in a native tissue. It is clear based on the ability of yohimbine to inhibit the extended oscillations detected with 100  $\mu\text{M}$  norepinephrine (Fig. 1 d) that the calcium oscillations are stimulated specifically by the  $\alpha 2\text{AR}$ . Overall, this suggests that the experiments and results described below using 100  $\mu\text{M}$  concentration of norepinephrine are likely to be physiologically relevant.

Fig. 3, a–i, shows translocation properties of mCh- $\gamma 11$ , mCh- $\gamma 3$ , and mCh- $\gamma 11-3$  and their corresponding calcium spiking profiles.  $\gamma 11$ ,  $\gamma 3$ , and  $\gamma 11-3$  translocation rates from the plasma membrane to internal membranes were consistent with known differences in the translocation rates of  $\gamma 11$  (~10 s) and  $\gamma 3$  (~200 s) (15) and with the known role of the C-terminus in translocation (Fig. 3, b, e, and h). The corresponding calcium oscillations in these cells showed distinctly different characteristics (Fig. 3, c, f, and i). The results suggest that translocation rates of  $\gamma$  subunits affect oscillatory dynamics.

### The relative proportion of fast versus slow translocating $\gamma$ subunit in a cell determines calcium oscillation characteristics

Cell-to-cell variability in calcium oscillations (Fig. S4) in populations of cells transfected with mCh- $\gamma 11$ , mCh- $\gamma 3$ ,

and mCh- $\gamma 11-3$  was characterized by fitting a probability density function to the frequency distribution of responses. Fig. 4, a and b, shows frequency distribution (*histograms*) of the number of spikes and duration of calcium oscillations in the previous populations. To compare across two populations, the histograms obtained for the three cell types were fitted with a nonparametric kernel distribution (Fig. 4, c–f). Cell populations transfected with mCh- $\gamma 11$  show a higher frequency for a lower number of calcium spikes (Fig. 4, c and d, *red trace*), and with shorter duration of oscillations (Fig. 4, e and f, *red trace*), whereas cell populations transfected with mCh- $\gamma 3$  (Fig. 4, c and e, *black trace*), and mCh- $\gamma 11-3$  (Fig. 4, d and f, *black trace*), shows a distribution with more cells exhibiting a higher number of calcium spikes and duration.

A control experiment with cells transfected with a plasma membrane marker, mCh-GPI (18) showed calcium oscillation characteristics similar to untransfected HeLa cells (Fig. 2, f and g), so the effects seen were not due to the expression of a heterologous protein.

Our experimental results reveal an inverse correlation between the fraction of  $\gamma_{\text{fast}}$  and corresponding number of calcium spikes in cells that belong to populations expressing different  $\gamma$  subunit types (Table S1). The probability density of cells with calcium spikes <3 (highest damping) is higher in  $\gamma 11$  transfected cells than in  $\gamma 11-3$  or  $\gamma 3$  transfected cells (Fig. 4, c and d) (Table S1). Additionally, the duration of calcium oscillations shows a similar relationship with the proportion of  $\gamma_{\text{fast}}$  in a cell. Cells with shorter durations of oscillations (0–100 s) are present more frequently in  $\gamma 11$  expressing populations than  $\gamma 3$  or  $\gamma 11-3$  expressing populations (Fig. 4, e and f) (Table S1). The consistent behavior of  $\gamma 11-3$  and  $\gamma 3$  in these experiments showed that their effect on oscillatory behavior was likely due to translocation kinetics and less likely due to any peculiarity that is subtype specific. Overall, the results suggest that the proportion of fast translocating  $\gamma$  subunits in a cell can tune calcium oscillatory behavior in terms of number and duration of spiking.

### $G_{\beta\gamma}$ reaction-translocation model exhibits regulation of calcium oscillations through $G_{\beta\gamma}$ redistribution among plasma membrane and internal membranes

To rationalize the experimental observations as noted previously, we developed a dynamic model of GPCR-mediated calcium oscillations by incorporating the basic

FIGURE 2 Cell-to-cell variability in  $\alpha 2\text{AR}$ -induced  $\text{Ca}^{2+}$  oscillation characteristics in a HeLa cell population for a range of drug doses. Representative time course of  $\text{Ca}^{2+}$  oscillation in HeLa cells at increasing doses of norepinephrine: (a) low (0.5  $\mu\text{M}$ ); (b) medium (5  $\mu\text{M}$ ); (c) high (100  $\mu\text{M}$ ). (d and e) Experimentally obtained frequency distribution of number (d) and duration (e) of  $\text{Ca}^{2+}$  spiking at different drug doses. Nonparametric kernel-density function fitted to (f) number and (g) duration of  $\text{Ca}^{2+}$  spiking at high drug dose, 100  $\mu\text{M}$  norepinephrine ( $n = 250$ ), ( $N_{\text{exp}} = 3$ ). To see this figure in color, go online.

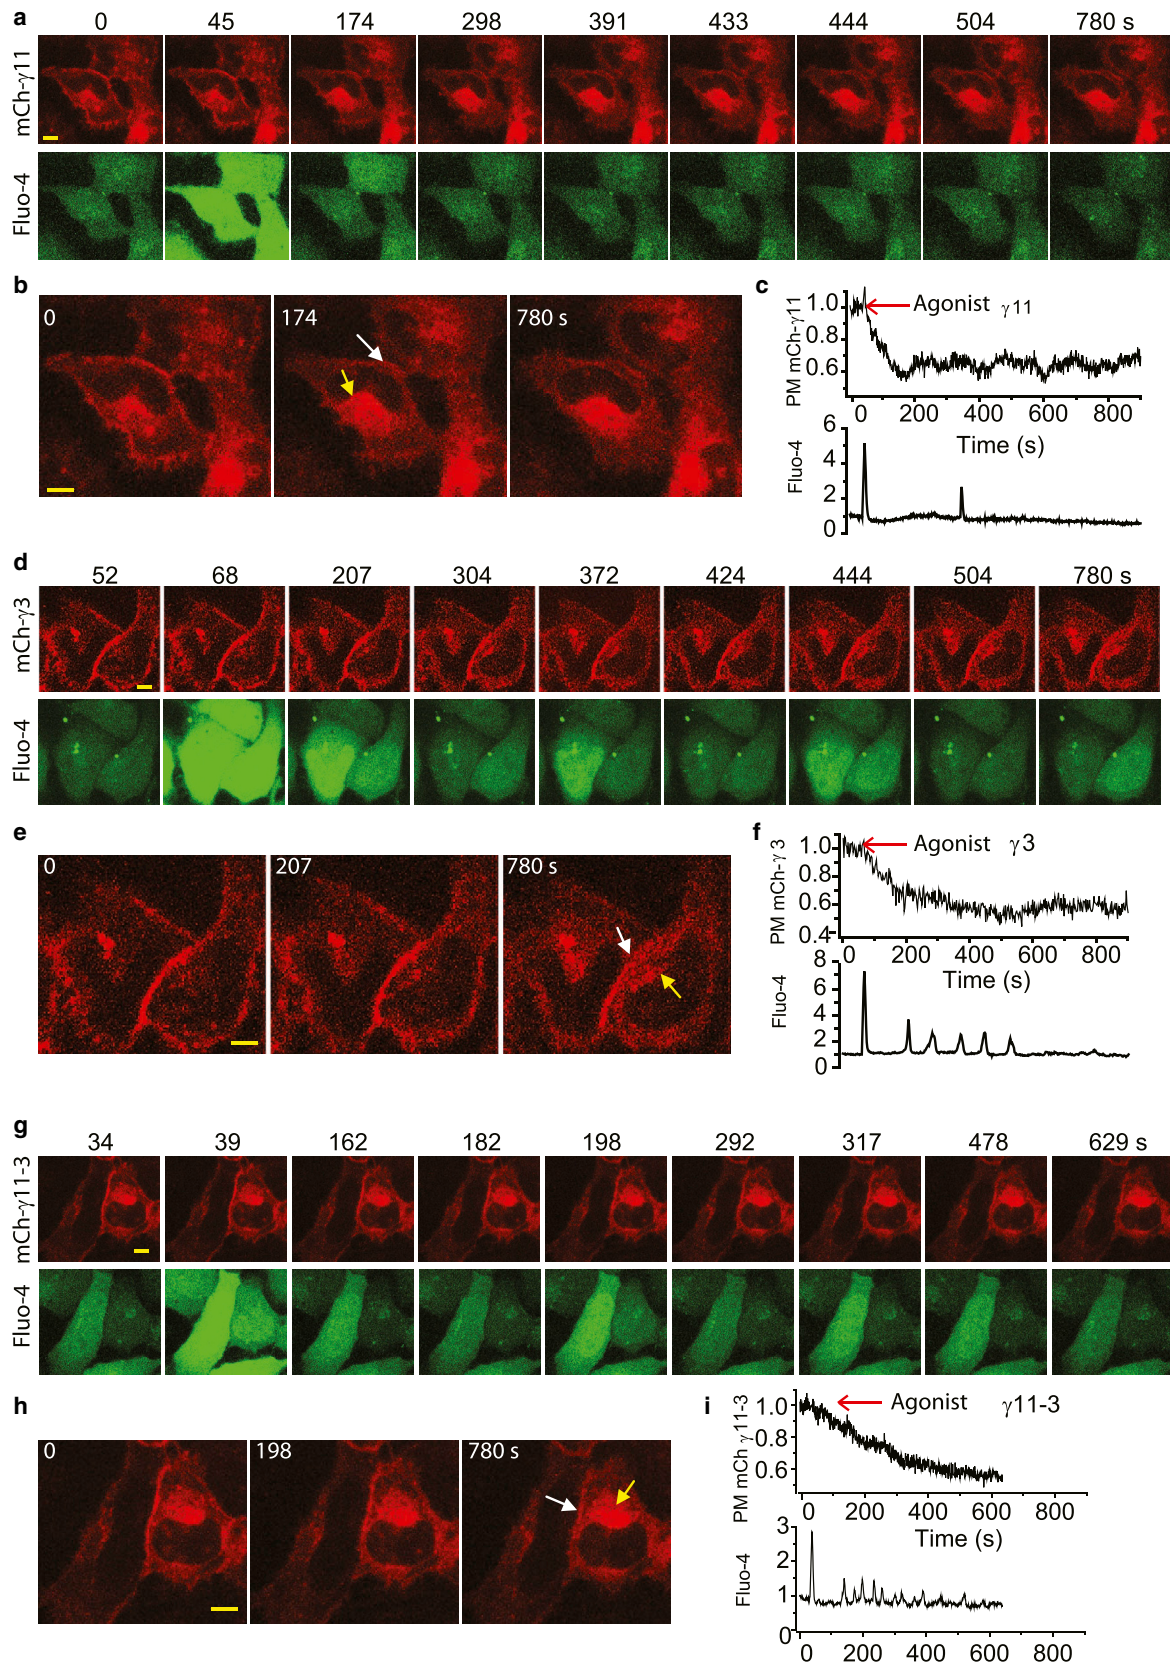

FIGURE 3 Effect of G-protein  $\gamma$  subunits with differential translocation rates on  $\text{Ca}^{2+}$  oscillations.  $\gamma$  translocation and  $\text{Ca}^{2+}$  oscillations induced by  $\alpha$ 2AR activation with 100  $\mu\text{M}$  norepinephrine were imaged in live cells. (a) Simultaneous monitoring of  $\gamma$  translocation and  $\text{Ca}^{2+}$  oscillation in two representative

(legend continued on next page)

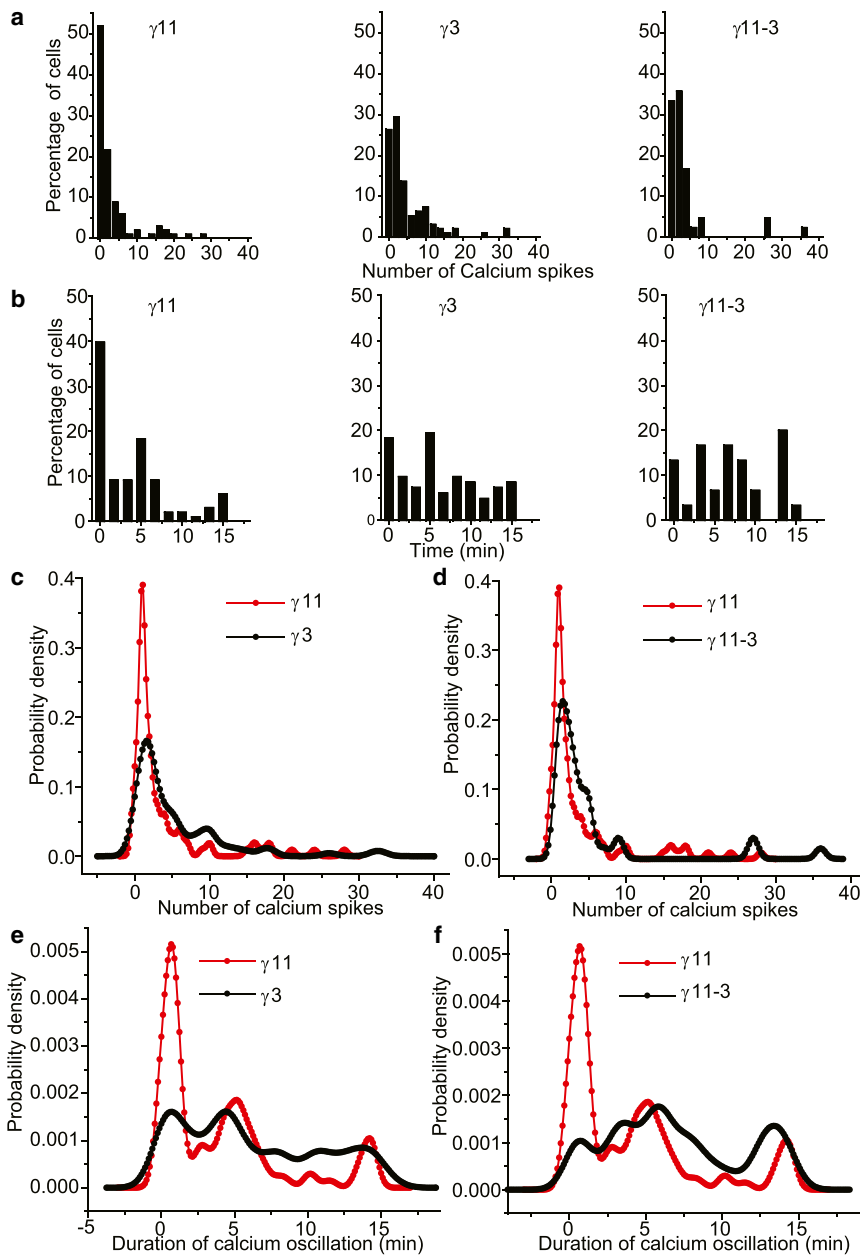

**FIGURE 4** Introduction of  $\gamma$  subunit with differential translocation rates yields distinct patterns of  $\alpha 2\text{AR}$ -induced  $\text{Ca}^{2+}$  oscillations in HeLa cells ( $100 \mu\text{M}$  agonist). (a) Frequency distribution of number of  $\text{Ca}^{2+}$  spikes in mCh- $\gamma 11$ , mCh- $\gamma 3$ , and mCh- $\gamma 11-3$  transfected cell populations. (b) Frequency distribution of the duration of  $\text{Ca}^{2+}$  oscillations in mCh- $\gamma 11$ , mCh- $\gamma 3$ , and mCh- $\gamma 11-3$  transfected cell populations (c–f) Comparison of the distribution of number and duration of  $\text{Ca}^{2+}$  spikes in different cell populations as denoted. For comparison, nonparametric kernel density fitted to the distribution of number and duration of  $\text{Ca}^{2+}$  spiking in mCh- $\gamma 11$ , mCh- $\gamma 3$ , and mCh- $\gamma 11-3$  transfected cells. All activation with  $100 \mu\text{M}$  norepinephrine. Number of cells studied: mCh- $\gamma 11 = 100$ , mCh- $\gamma 3 = 94$ , mCh- $\gamma 11-3 = 45$ . ( $N_{\text{exp}}=3$ ). To see this figure in color, go online.

framework from Kummer et al. (9). The reaction schematic of Gi-mediated calcium oscillation is presented in Fig. 5 a. The model was modified to consider interactions specific to the Gi pathway and translocation of a  $\beta\gamma$  complex with a specific  $\gamma$  subtype. The model incorporates negative and positive feedbacks in the core motif to capture oscillatory

behavior. The core model uses the following components of the signaling network: i), active  $\beta\gamma$  concentration at the plasma membrane ( $\beta\gamma_{\text{PM}}$ ); ii),  $\beta\gamma$  concentration in internal membranes ( $\beta\gamma_{\text{IM}}$ ); iii), activated PLC-  $\beta$  concentration (PLC-  $\beta$ ); iv), calcium in the cytosol ( $\text{Ca}_{\text{cyt}}$ ); and v), calcium in intracellular sources ( $\text{Ca}_{\text{ER}}$ ). Details of the model are in

HeLa cells expressing mCh- $\gamma 11$  subunit and loaded with Fluo-4. Upper panel: mCh- $\gamma 11$  fluorescence.  $\gamma$  distribution on the plasma membrane (white arrow), and internal membranes (yellow arrow).  $\gamma$  subunit redistribution occurs after GPCR activation. Lower panel: Fluo-4 intensity. (b) Time course of  $\gamma 11$  subunit depletion from plasma membrane in one representative cell. (c) Time course of  $\text{Ca}^{2+}$  oscillation for the corresponding cell. (d) Similar simultaneous monitoring of  $\gamma$  subunit translocation and  $\text{Ca}^{2+}$  oscillation in two representative HeLa cells expressing mCh- $\gamma 3$  subunit and loaded with Fluo-4. (e and f) Time course of  $\gamma 3$  subunit depletion from PM and  $\text{Ca}^{2+}$  oscillation in a representative cell. (g) Similar results from cells expressing mCh- $\gamma 11-3$ . (h and i) Time course of  $\gamma 11-3$  subunit depletion from PM and  $\text{Ca}^{2+}$  oscillation from a representative cell. Scale bar =  $10 \mu\text{m}$ . Number of cells studied in each case  $\geq 45$ .  $N_{\text{exp}} = 3$ . To see this figure in color, go online.

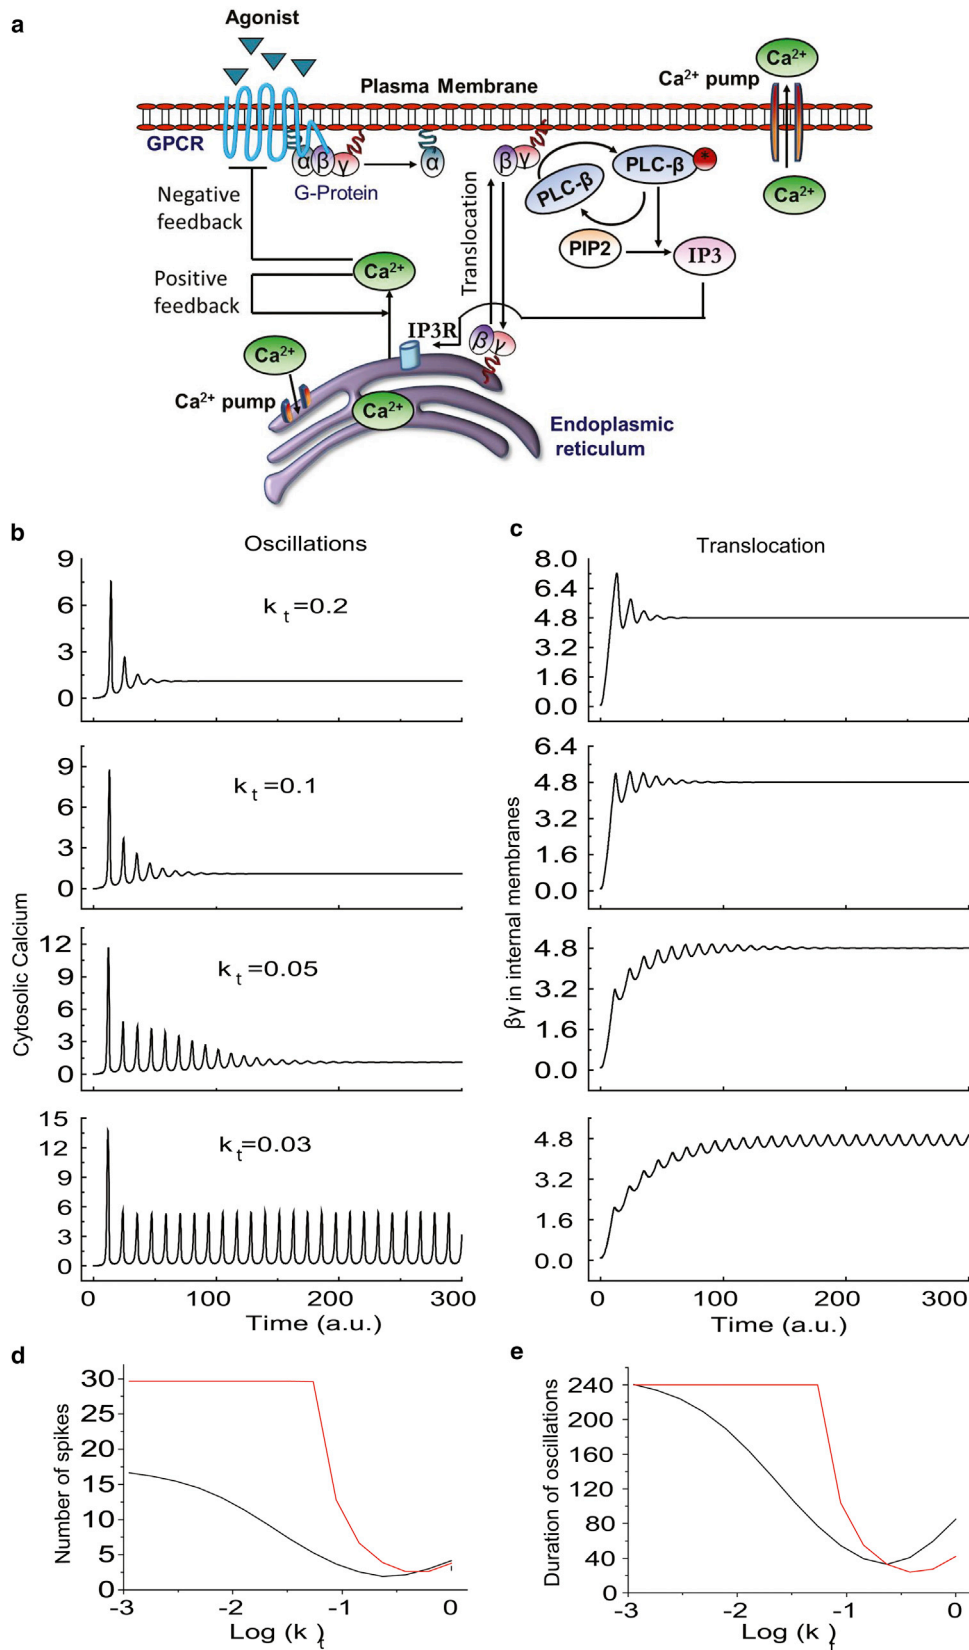

FIGURE 5 The role of translocation dynamics in regulation of Gi-mediated  $\text{Ca}^{2+}$  oscillation (in silico analysis from a single  $\gamma$  subunit model) (a) Simplified biochemical reaction schematic of the Gi coupled GPCR activated signaling network that induces  $\text{Ca}^{2+}$  oscillations in the presence of  $\beta\gamma$  translocation

(legend continued on next page)



the [Supporting Material](#) (section 1) and model parameters are in [Table S2](#).

We performed numerical simulations to obtain the patterns of calcium oscillations and the profile of  $\beta\gamma$  subunit translocation to internal cell membranes when varying translocation rates ( $k_t$ ) ([Fig. 5, b and c](#)). Simulation results show that the rate of  $G\beta\gamma$  translocation can modulate the number and duration of calcium spikes in a cell ([Fig. 5, d and e](#)). These results show that even though eventually the same fraction of fast and slow  $G\beta\gamma$  goes to internal membranes, in the case of  $G\beta\gamma_{\text{fast}}$ , the oscillations are totally damped, whereas in the case of  $G\beta\gamma_{\text{slow}}$ , calcium oscillations continue even after translocation has reached steady state (e.g., compare  $kt = 0.2$  and  $0.03$  at  $t = 200$ ). At this time, in both cases the concentration of  $G\beta\gamma$  in intracellular membranes is the same, but calcium oscillations are sustained only in the case of  $\beta\gamma_{\text{slow}}$ . This suggests that the rate at which  $G\beta\gamma$  translocate can have a striking impact on calcium oscillation characteristics.

Eigenvalue analysis of the Gi-mediated calcium oscillation model (single  $\gamma$ -subunit model) shows that both damping and frequency of calcium oscillations are dependent on  $\beta\gamma$  the translocation rate ([Fig. S5](#)). Overall, results reveal an inverse dependence of the number of calcium spikes and their duration on the rate of  $\gamma$  subunit translocation ([Fig. 5, d and e](#)).

### Bifurcation analysis of the single-subunit calcium model

To characterize the effect of translocation on calcium oscillations, we performed bifurcation analysis for the previous calcium model ([Fig. 5](#)) with and without translocation of the  $G\beta\gamma$  subunit. [Fig. 6 a](#) shows a bifurcation plot with respect to agonist concentration for four different values of translocation rates ( $k_t$ ). Results show that a minimum amount of agonist is necessary to induce oscillations via Hopf bifurcations. For example with  $k_t = 0$ , a minimum agonist concentration of 1.3 AU will induce oscillations. The maximum and minimum values of the amplitude attained during calcium oscillation are also depicted in [Fig. 6 a](#). Furthermore, on increasing the agonist concentration, the maximum value of the amplitude increases, whereas the minimum remains the same. On increasing the translocation rate  $k_t$ , the Hopf bifurcation point shifts to the right indicating that higher agonist concentration is required to induce oscillations. Note that the steady-state value of the cytosolic calcium is independent of the translocation rate. However, the maxima of oscillation decrease with increase in the value of  $k_t$ , whereas the minima remain

unaltered. The Hopf bifurcation point can also be visualized by obtaining the leading Eigen value. As seen in [Fig. 6 b](#), the real part of the Eigen value changes from a negative to a positive value at Hopf bifurcation and is a function of the translocation rate as discussed previously. The stable steady state is observed for the negative and the positive real part of the Eigen value indicating the loss of stability leading to oscillation as shown through simulations (see [Fig. 5, b and c](#)). The phase plane plot (for various  $k_t$  value) showing dynamic cytosolic calcium versus  $\beta\gamma$  concentrations for a fixed agonist dose shows a limit cycle in the absence of translocation ([Fig. 6 c](#)). Results show that, on increasing the translocation rate, the space enclosed by the limit cycle shrinks. On further increasing the translocation rate, the limit cycle loses its stable focus leading to a damped response. This aspect is depicted in [Fig. 6 d](#), wherein for a given agonist dose, the cytosolic calcium concentration is plotted versus the translocation rate,  $k_t$ . In the absence of translocation, the system oscillates and on introducing translocation the amplitude of the oscillation decreases before shifting to a damped response. For a given agonist concentration there exists a critical translocation rate beyond which the system loses oscillatory behavior.

The previous analysis of the Gi-mediated calcium oscillation model demonstrates that both damping and frequency of calcium oscillations are dependent on the  $\beta\gamma$  translocation rate. Overall, the results reveal an inverse dependence of the number of calcium spikes and their duration on the rate of  $\gamma$  subunit translocation ([Fig. 5, d and e](#)), over a certain range of translocation rate constant  $k_t$ . The results from the single subunit model here are consistent with the experimental observations in HeLa cells ([Figs. 3 and 4](#)). Although the calcium model presented here does not account for the receptor endocytosis, incorporating such effects will not affect the relation between translocation rate constant and the shift of the Hopf bifurcation point ([Fig. S6 a and b](#)). Additionally, simulations indicated that varying individual parameters by  $\pm 20\%$  (result shown for two parameters in [Fig. S7](#)) does not influence the trend observed in the property of bifurcation (as in [Fig. 6 a](#)).

### Two-subunit model - simulations of oscillations in cells with different proportions of $\gamma$ subunit types

Because HeLa cells contain multiple  $\gamma$  subunits with differential translocation rates ( $\gamma 5$ ,  $\gamma 10$ ,  $\gamma 11$ , and  $\gamma 12$ ) rather than a single  $\gamma$  subunit (15), we constructed a two-subunit model for Gi-mediated calcium oscillations containing two types of  $\gamma$  subunits with distinct translocation kinetics

---

between plasma membrane and internal membranes. (b) Simulation of the time course of the  $\text{Ca}^{2+}$  oscillation pattern for different  $\gamma$  translocation rates ( $k_t$ ). (c) Simulation of the corresponding kinetics of  $\gamma$  translocation to internal membrane. (d) Increasing the translocation rate leads to a decreased number of  $\text{Ca}^{2+}$  spikes measured over a fixed time period (240 s). (e) Increasing the translocation rate leads to earlier switching off and shorter duration of  $\text{Ca}^{2+}$  oscillation (black: low; red: high dose). To see this figure in color, go online.

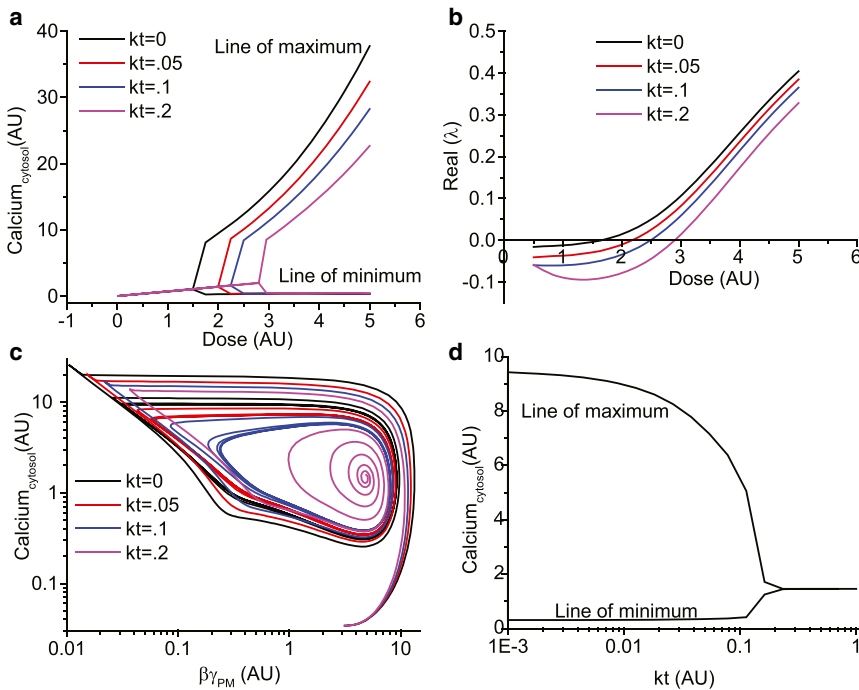

**FIGURE 6** Bifurcation analysis of the single subunit calcium model (a) Steady-state cytosolic calcium concentration (arbitrary units) as a function of agonist dose for different translocation rates (kt). The upper lines as depicted by Line of maximum indicates maximum of the oscillations. The lower lines as depicted by Lines of minimum indicates minimum of oscillations. (b) Real part of Eigen values as a function of agonist dose (for different kt) (c) Dynamic phase response in terms of cytosolic calcium concentration versus  $\beta\gamma$  subunit concentration at the plasma membrane for different values of kt. (d) Steady-state calcium concentration as a function of translocation rate constant kt for an agonist dose. The line of maximum and minimum indicates as mentioned in (a). The single subunit calcium model was simulated for various translocation rates to obtain the previous results. In (a–c), kt values used are kt = 0 (black), kt = 0.05 (red), kt = 0.1 (blue), kt = 0.2 (purple). To see this figure in color, go online.

(Supporting Material 2.1, 2.2). Using this model, we then simulated the calcium response in the presence of differing proportions of two types of  $\gamma$  subunits, namely, slow translocating ( $\gamma_{slow}$ ,  $k_t = 0.02 \text{ S}^{-1}$ ) and fast translocating ( $\gamma_{fast}$ ,  $k_t = 0.2 \text{ S}^{-1}$ ). The number of calcium spikes (Fig. 7 a) and the total duration of oscillations (Fig. 7 b) decrease with increasing proportion of the faster translocating subunit ( $\gamma_{fast}/\gamma_{total}$ ) due to damped oscillation for both low and high input stimulus values (corresponding to low and high dose). However, the shift from sustained to damped oscillation with increasing  $\gamma_{fast}/\gamma_{total}$  is steeper for a higher dose of agonist (Fig. 7, a and b). Simulation results show that the dependence between number of spikes and duration of oscillation with  $\gamma_{fast}/\gamma_{total}$  follows an inverse function (Fig. 7, a and b), as seen in experiments with HeLa cells (Figs. 3 and 4).

To obtain the calcium response in a cell population, we used a distribution of the activation rate of  $\beta\gamma$  (rate at which active  $\beta\gamma$  is generated after GPCR activation) at the plasma membrane in the two-subunit model. Such an approach has been used to model cell-to-cell variability in other biological systems (19–22). In this model, we assumed a Gamma distribution ( $F(R, k, \theta) = 1/\theta^k \cdot 1/\Gamma(k) R^{k-1} e^{-(R/\theta)}$ ), where,  $\theta$  = scale factor;  $k$  = shape factor) in G-protein activation, which may arise due to a variable expression level (Supporting Material 2.3). The Gamma distribution in protein expression level has been computationally and experimentally shown to exist in cell populations (23,24). We simulated calcium oscillations in a cell population for various proportions of fast versus slow translocating subunits ( $\gamma_{fast}:\gamma_{slow}$ ) (Fig. 7, c and d). In cells containing only slow  $\gamma$  sub-

units ( $\gamma_{fast}:\gamma_{slow} - 0:100$ ), the damping of oscillations showed wide cell-to-cell variability (Fig. 7, c and d). This is similar to the experimental observations for cells transfected with  $\gamma_3$  or  $\gamma_{11-3}$  subunit (Fig. 4, c–f, black traces). Introduction of a higher proportion of a fast subunit ( $\gamma_{fast}:\gamma_{slow} - 100:0$ ) reduced this variability in oscillation characteristics such that most of the cells showed a relatively short period of oscillations. This result is consistent with experimental observations for cell populations overexpressing the  $\gamma_{11}$  subunit (Fig. 4, c–f, red traces).

### Experiments and simulations: relative proportion of $\gamma_{fast}$ regulates cell-to-cell variability in calcium oscillation in a population

The two-subunit model predicts that the increase in the proportion of fast translocating  $\gamma$  subunits would increase the fraction of cells having damped calcium oscillation and reduce cell-to-cell variability (Fig. 7, a and b). To test this prediction, we then compared the calcium spiking characteristics of  $\gamma_{11}$  knockdown HeLa cells with cells expressing either control shRNA,  $\gamma_{11}$  or  $\gamma_3$  (Fig. 7, e and f). Movie S4 and Movie S5 show  $\alpha_2\text{AR}$ -induced calcium oscillations in control shRNA and  $\gamma_{11}$  knockdown HeLa cells. A nonparametric kernel distribution fitted to the experimental (Fig. 7, e and f), and simulated distributions (Fig. 7, c and d), depicts the continuous shift in distribution of number of spikes and duration of calcium oscillation with increasing percentage of  $\gamma_{fast}$ .

The transiently transfected cells show an intrinsic variation in the expression levels of  $\gamma$  subunits. When calculated

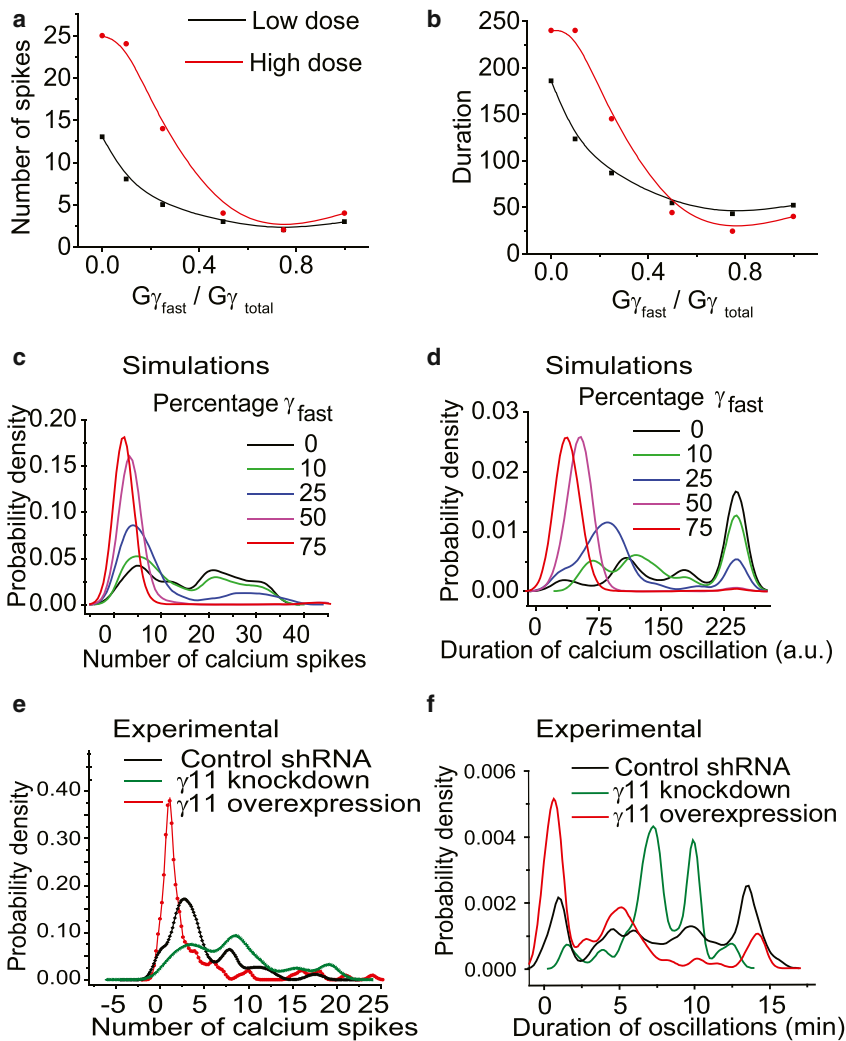

FIGURE 7 Two  $\gamma$ -subunit model ( $\gamma_{fast}$  and  $\gamma_{slow}$ ) shows that the ratio of  $\gamma_{fast}:\gamma_{slow}$  regulates the distribution of  $Ca^{2+}$  oscillation characteristics in a cell population. We invoked different ratios of fast and slow  $\gamma$  subunits by varying  $m_1$  and  $m_2$  values in the model from 0 to 1 (model description in the [Supporting Material](#)). Changes in number (a) and duration (b) of  $Ca^{2+}$  spikes in response to increasing the fraction of  $\gamma_{fast}$  at different input doses (black: low; red: high dose). Increasing the fraction of  $\gamma_{fast}$  induces a shift in distribution of  $Ca^{2+}$  oscillation pattern in a HeLa cell population. (c and d) Simulated distribution of  $Ca^{2+}$  spikes in a cell population containing different percentages of  $\gamma_{fast}$ . (e and f) Experimentally observed distribution of  $Ca^{2+}$  spikes in  $\gamma_{11}$  knockdown, control shRNA, and  $\gamma_{11}$  cell populations.  $n_{control} = 150$ ,  $n_{\gamma_{11}\text{-knockdown}} = 90$ ,  $n =$  number of cells studied. For both experiment and simulation, nonparametric kernel density function was fitted to the distribution of the number and duration of  $Ca^{2+}$  spiking in a cell population. ( $N_{exp} = 3$ ). Details about the simulation of population response is in the [Supporting Material](#), section 2.3. To see this figure in color, go online.

from mCherry intensity, moving from low expression of introduced  $\gamma_{11}$  to high, the probability of cells having a low number of calcium spikes increases and this is reflected in the simulation (Fig. S8, a and b). Furthermore, our results show that agonist concentrations do not have a significant effect on  $\gamma_{fast}:\gamma_{slow}$  dependency of Gi coupled GPCR-mediated calcium oscillation distribution in a cell population (Fig. S9). Overexpression of  $\gamma_{11}$  increases the proportion of cells with a lower number of calcium spikes ( $\sim 70\%$  cells with spike number  $< 3$ ). In contrast, if  $\gamma_{11}$  is below native levels, it decreases the fraction of cells with a low number of calcium spikes ( $\sim 17\%$  cells with spike number  $< 3$ ) (Table S3). This is consistent with the trend predicted from model simulations for different  $\gamma_{fast}:\gamma_{slow}$  ratios (Fig. 7, c and d).

## DISCUSSION

Systems level properties of signaling networks cannot be understood intuitively from the molecular interaction map of the network (25–28). This is especially true for properties

that may emerge as a result of dynamic signaling events that show spatiotemporal variation in a cell. Although the components of many signaling networks and their individual activities have been identified, there is less information about the role of the spatiotemporal dynamics of signaling molecules in regulating the properties of these networks. Here, we perform dynamic analysis using a model to examine the effect of translocation of  $G\beta\gamma$  subunits on oscillatory behavior of cytosolic calcium.

Dynamic properties of a system, such as oscillations, are achieved through a structural motif consisting of components with specific parametric values. Such dynamic behavior can be analyzed through bifurcation analysis (26).

The bifurcation analysis of a single subunit model suggested that higher amounts of agonist concentrations are required to achieve oscillation for a network motif with translocation. Thus, for a given agonist concentration a critical translocation rate constant will determine the Hopf bifurcation point beyond which the oscillations will damp over time. This allows oscillations to be terminated even

in the presence of a stimulus. This theoretical framework also suggests that such a signaling motif can be used as a tuning mechanism to regulate system oscillations through differential translocation of a signaling component of a network.

Using genetic perturbation and live cell imaging, this prediction was tested experimentally by focusing on the receptor-mediated translocation of the G $\beta\gamma$  complex. Our results suggest that the relative proportion of different  $\gamma$  types expressed in a cell can play a role in regulating extracellular signal-induced calcium oscillation characteristics. Variability in IP<sub>3</sub> production, GIRK potassium channel responses, and Golgi breakdown have been observed in response to the differential translocation rates of G $\beta\gamma$  subunits (15,17,29). Results show that G $\beta\gamma$  translocation can regulate critical network-level properties such as calcium oscillations.

In the current work, we specifically focus on the effect of translocation on norepinephrine-stimulated calcium oscillation. However, we did not analyze the effect of oscillation on translocation. This is a question of interest for future focus. Similar studies can also be performed to investigate for translocation embedded motif for other agonists and receptors. The oscillations observed in experiments are stochastic in nature. Multiple sources of noise in the oscillatory network may give rise to such stochastic responses. Furthermore, deterministic chaotic oscillations may also give rise to such a response (8). A general problem in addressing such stochasticity is to distinguish deterministic chaos from oscillations superimposed by the stochastic noise.

Heterogeneity in cell signaling responses to GPCR activation has been noted (5,19,30). Our data suggest that cell-to-cell variability in calcium oscillations in a population is regulated by the relative proportion of  $\gamma$  subunit types in the cell. We show that cells expressing predominantly slow translocating subunits will show wide variability in the duration of oscillations, whereas cells expressing predominantly fast translocating subunits show oscillations for relatively short durations before damping. Thus, the physiological output of a cell can be influenced by its  $\gamma$  subunit profile and by gene expression or posttranslational changes in this profile.

Engineering systems are designed by setting specific parametric values for components of a motif to yield a desired dynamic property. A classical engineering analogy is the RLC circuit composed of a resistor (R), an inductor (L), and a capacitor (C) in series to yield an oscillatory response in circuit current. Although the capacitance and inductance quantify the frequency and amplitude of the sustained oscillation, the resistance characterizes the damping property. In such a circuit, energy is transferred back and forth from the inductor to the capacitor, whereas the resistor causes the decay of oscillations. Thus, the desired rate of damping and frequency of oscillations can be designed by varying the parametric value of the resistance.

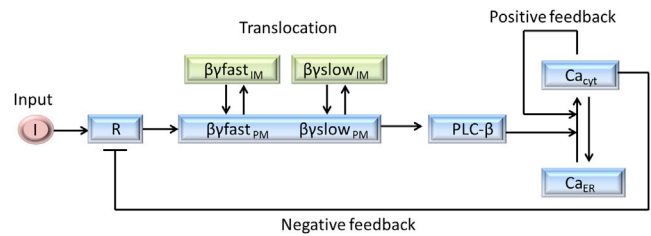

FIGURE 8 Schematic of G-protein  $\gamma$  subunit translocation embedded motif that regulates GPCR-induced calcium oscillation. Presence of two  $\gamma$  subunit types with different translocation rates is assumed. In the signaling pathway the positive and negative feedbacks yield sustained oscillations similar to the inductor and capacitor in a RLC circuit. The translocation of the  $\beta\gamma$  subunit offers resistance to the oscillations, which dampens the response analogous to the electrical circuit. To see this figure in color, go online.

Here, by drawing an analogy from the electrical RLC circuit, we performed a similar analysis to characterize the damping behavior of calcium oscillations in HeLa cells. A combination of theoretical analysis and experimental evidence suggests that translocation of the signaling protein is part of an oscillatory network (Fig. 8). The network model here contains fast and slow feedback loops in the signaling motif and yields sustained oscillations similar to inductance and capacitance in the RLC circuit, whereas  $\beta\gamma$  translocation characterizes this damping behavior akin to the role of resistor. Thus, translocation rates decide the decay of amplitude and change in the frequency of calcium oscillations and can be used specifically to design desired oscillatory characteristics.

Known desensitization mechanisms predominantly involve the phosphorylation of a receptor and its internalization resulting in GPCR signaling activity being terminated for relatively long periods of time (31). The results here suggest that GPCR-mediated  $\beta\gamma$  translocation in a cell can dynamically damp a critical signaling output. There is evidence that other signaling proteins such as Ras are not confined to specific cell compartments as originally thought, but are capable of extracellular signal directed spatial redistribution between cell membranes (32,33). Translocation embedded motifs may thus play a general role in regulating signaling pathways by acting as a simple desensitizing mechanism that is capable of rapid recovery. The computational and experimental framework used here can be applied to probe the role of other signal triggered protein movement in regulating cell function.

## SUPPORTING MATERIAL

Nine figures, five movies, three tables, supporting data, and references (35–41) are available at [http://www.biophysj.org/biophysj/supplemental/S0006-3495\(14\)00520-7](http://www.biophysj.org/biophysj/supplemental/S0006-3495(14)00520-7).

We thank Pariksheet Nanda from Andor Technology for technical assistance regarding data analysis using Andor IQ software, Gongfu Zhou from the Department of Biostatistics at Washington University School of

Medicine for statistical analysis, Soumya Jana and Patrick O'Neill for discussions and Rishikesh Kumar Gupta and Karthik MG for their contribution in data analysis. We also thank Valeria Caiolfa for the GPI construct.

This research was supported by National Institutes of Health (NIH) grants GM069027 and GM080558 (N.G.).

## REFERENCES

- Berridge, M. J. 1997. The AM and FM of calcium signalling. *Nature*. 386:759–760.
- Prank, K., F. Gabbiani, and G. Brabant. 2000. Coding efficiency and information rates in transmembrane signaling. *Biosystems*. 55:15–22.
- Iino, M. 2010. Spatiotemporal dynamics of Ca<sup>2+</sup> signaling and its physiological roles. *Proc. Jpn. Acad., Ser. B, Phys. Biol. Sci.* 86:244–256.
- Dupont, G., L. Combettes, ..., J. W. Putney. 2011. Calcium oscillations. *Cold Spring Harb. Perspect. Biol.* 3: a00426-1–a00426-18.
- Bao, X. R., I. D. C. Fraser, ..., M. I. Simon. 2010. Variability in G-protein-coupled signaling studied with microfluidic devices. *Biophys. J.* 99:2414–2422.
- Nash, M. S., K. W. Young, ..., S. R. Nahorski. 2001. Intracellular signalling. Receptor-specific messenger oscillations. *Nature*. 413:381–382.
- Dolmetsch, R. E., R. S. Lewis, ..., J. I. Healy. 1997. Differential activation of transcription factors induced by Ca<sup>2+</sup> response amplitude and duration. *Nature*. 386:855–858.
- Schuster, S., M. Marhl, and T. Höfer. 2002. Modelling of simple and complex calcium oscillations. From single-cell responses to intercellular signalling. *Eur. J. Biochem.* 269:1333–1355.
- Kummer, U., L. F. Olsen, ..., G. Baier. 2000. Switching from simple to complex oscillations in calcium signaling. *Biophys. J.* 79:1188–1195.
- Politi, A., L. D. Gaspers, ..., T. Höfer. 2006. Models of IP<sub>3</sub> and Ca<sup>2+</sup> oscillations: frequency encoding and identification of underlying feedbacks. *Biophys. J.* 90:3120–3133.
- Jovic, A., B. Howell, ..., S. Takayama. 2010. Phase-locked signals elucidate circuit architecture of an oscillatory pathway. *PLoS Comput. Biol.* 6:e1001040.
- Means, S. A., and J. Sneyd. 2010. Spatio-temporal calcium dynamics in pacemaking units of the interstitial cells of Cajal. *J. Theor. Biol.* 267:137–152.
- Dorn, 2nd, G. W., K. J. Oswald, ..., S. B. Liggett. 1997.  $\alpha$  2A-adrenergic receptor stimulated calcium release is transduced by Gi-associated G( $\beta$   $\gamma$ )-mediated activation of phospholipase C. *Biochemistry*. 36:6415–6423.
- Saini, D. K., V. Kalyanaraman, ..., N. Gautam. 2007. A family of G protein  $\beta\gamma$  subunits translocate reversibly from the plasma membrane to endomembranes on receptor activation. *J. Biol. Chem.* 282:24099–24108.
- Ajith Karunarathne, W. K., P. R. O'Neill, ..., N. Gautam. 2012. All G protein  $\beta\gamma$  complexes are capable of translocation on receptor activation. *Biochem. Biophys. Res. Commun.* 421:605–611.
- O'Neill, P. R., W. K. Karunarathne, ..., N. Gautam. 2012. G-protein signaling leverages subunit-dependent membrane affinity to differentially control  $\beta\gamma$  translocation to intracellular membranes. *Proc. Natl. Acad. Sci. USA*. 109:E3568–E3577.
- Chisari, M., D. K. Saini, ..., N. Gautam. 2009. G protein subunit dissociation and translocation regulate cellular response to receptor stimulation. *PLoS ONE*. 4:e7797.
- Hellriegel, C., V. R. Caiolfa, ..., M. Zamai. 2011. Number and brightness image analysis reveals ATF-induced dimerization kinetics of uPAR in the cell membrane. *FASEB J.* 25:2883–2897.
- Wang, C. J., A. Bergmann, B. Lin, K. Kim, and A. Levchenko. 2012. Diverse sensitivity thresholds in dynamic signaling responses by social amoebae. *Sci. Signal.* 5: ra17-1–ra17-11.
- Spencer, S. L., S. Gaudet, ..., P. K. Sorger. 2009. Non-genetic origins of cell-to-cell variability in TRAIL-induced apoptosis. *Nature*. 459:428–432.
- Ferrell, Jr., J. E., and E. M. Machleder. 1998. The biochemical basis of an all-or-none cell fate switch in *Xenopus* oocytes. *Science*. 280:895–898.
- Bhat, P. J., and K. V. Venkatesh. 2005. Stochastic variation in the concentration of a repressor activates GAL genetic switch: implications in evolution of regulatory network. *FEBS Lett.* 579:597–603.
- Cohen, A. A., T. Kalisky, ..., U. Alon. 2009. Protein dynamics in individual human cells: experiment and theory. *PLoS ONE*. 4:e4901.
- Friedman, N., L. Cai, and X. S. Xie. 2006. Linking stochastic dynamics to population distribution: an analytical framework of gene expression. *Phys. Rev. Lett.* 97:168302.
- Kholodenko, B. N. 2006. Cell-signalling dynamics in time and space. *Nat. Rev. Mol. Cell Biol.* 7:165–176.
- Ferrell, Jr., J. E., T. Y.-C. Tsai, and Q. Yang. 2011. Modeling the cell cycle: why do certain circuits oscillate? *Cell*. 144:874–885.
- Rangamani, P., and R. Iyengar. 2007. Modelling spatio-temporal interactions within the cell. *J. Biosci.* 32:157–167.
- Brandman, O., and T. Meyer. 2008. Feedback loops shape cellular signals in space and time. *Science*. 322:390–395.
- Saini, D. K., W. K. A. Karunarathne, ..., N. Gautam. 2010. Regulation of Golgi structure and secretion by receptor-induced G protein  $\beta\gamma$  complex translocation. *Proc. Natl. Acad. Sci. USA*. 107:11417–11422.
- Karunarathne, W. K., L. Giri, ..., N. Gautam. 2013. Optical control demonstrates switch-like PIP<sub>3</sub> dynamics underlying the initiation of immune cell migration. *Proc. Natl. Acad. Sci. USA*. 110:E1575–E1583.
- Mushegian, A., V. V. Gurevich, and E. V. Gurevich. 2012. The origin and evolution of G protein-coupled receptor kinases. *PLoS ONE*. 7:e33806.
- Fivaz, M., and T. Meyer. 2005. Reversible intracellular translocation of KRas but not HRas in hippocampal neurons regulated by Ca<sup>2+</sup>/calmodulin. *J. Cell Biol.* 170:429–441.
- Chandra, A., H. E. Grecco, ..., P. I. Bastiaens. 2012. The GDI-like solubilizing factor PDE $\delta$  sustains the spatial organization and signaling of Ras family proteins. *Nat. Cell Biol.* 14:148–158.
- Cho, J.-H., D. K. Saini, ..., N. Gautam. 2011. Alteration of Golgi structure in senescent cells and its regulation by a G protein  $\gamma$  subunit. *Cell. Signal.* 23:785–793.
- Bourne, H. R., and L. Stryer. 1992. The target sets the tempo. *Nature*. 358:541–543.
- Kawabata, S., R. Tsutsumi, ..., M. Okada. 1996. Control of calcium oscillations by phosphorylation of metabotropic glutamate receptors. *Nature*. 383:89–92.
- Oancea, E., and T. Meyer. 1998. Protein kinase C as a molecular machine for decoding calcium and diacylglycerol signals. *Cell*. 95:307–318.
- O'Neill, P. R., W. K. Karunarathne, ..., N. Gautam. 2012. G-protein signaling leverages subunit-dependent membrane affinity to differentially control betagamma translocation to intracellular membranes. *Proc. Natl. Acad. Sci. USA*. 109:E3568–E3577.
- Berridge, M. J. 1993. Inositol trisphosphate and calcium signaling. *Nature*. 361:315–325.
- Pietrobon, D., F. Di Virgilio, and T. Pozzan. 1990. Structural and functional aspects of calcium homeostasis in eukaryotic cells. *Eur. J. Biochem.* 193:599–622.
- Ferrell, Jr., J. E., and E. M. Machleder. 1998. The biochemical basis of an all-or-none cell fate switch in *Xenopus* oocytes. *Science*. 280:895–898.

# **A G-Protein Subunit Translocation Embedded Network Motif Underlies GPCR Regulation of Calcium Oscillations**

Lopamudra Giri,<sup>1</sup> Anilkumar K. Patel,<sup>2</sup> W. K. Ajith Karunarathne,<sup>1\*</sup> Vani Kalyanaraman,<sup>1</sup> K. V. Venkatesh,<sup>2\*</sup> and N. Gautam<sup>1,3\*</sup>

<sup>1</sup>Department of Anesthesiology, Washington University School of Medicine, St. Louis, Missouri; <sup>2</sup>Department of Chemical Engineering, Indian Institute of Technology Bombay, Mumbai, India; and <sup>3</sup>Department of Genetics, Washington University School of Medicine, St. Louis, Missouri

## 1. Model description for Gi mediated Calcium oscillation - single $\gamma$ subunit model

A mathematical model was developed to investigate the role of  $G\beta\gamma$  translocation on Gi coupled GPCR induced  $Ca^{2+}$  oscillation. We used the basic framework of a  $G_q$  receptor-operated  $Ca^{2+}$  oscillation as proposed by Kummer *et. al.*,(1) and modified it to consider interactions specific for the Gi pathway and the spatial redistribution of the  $G\beta\gamma$  subunit. The main components for this model are, (i) input (ii) activated  $G\beta\gamma$  at the plasma membrane ( $\beta\gamma_{PM}$ ), (iii)  $G\beta\gamma$  at the internal membrane ( $\beta\gamma_{IM}$ ), (iv) active phospholipase-C, (PLC- $\beta$ ), (v) cytosolic calcium ( $Ca_{cyt}$ ) and (vi) calcium in ER ( $Ca_{ER}$ ). The current model accounts for the formation and disappearance of  $G\beta\gamma$ , translocation of  $G\beta\gamma$  between plasma membrane and internal membranes, formation and degradation of PLC- $\beta$  and calcium fluxes across the ER and plasma membrane. The model is presented by equations S1-S5.

The compartmental model for a single  $\gamma$  subunit is based on the following assumptions,

1. The external agonist interacts with the GPCR and leads to the dissociation of the heterotrimer to form active  $G\beta\gamma$ . The rate of active  $G\beta\gamma$  formation is given by the first term in equation S1., which is proportional to R (activated receptor concentration) and  $R_0$  (basal receptor).
2. As the GTP hydrolysis of activated  $G\alpha$  is facilitated by active PLC- $\beta$  (2), formation of the G protein heterotrimer by association of  $G\alpha$  and  $G\beta\gamma$  is proportional to PLC- $\beta$  and follows Michaelis-Menten kinetics with respect to  $G\beta\gamma$  (Second term in equation S1).
3. There is a negative feedback on receptor activation through  $Ca^{2+}$  mediated kinase that leads to  $G\beta\gamma$  inactivation proportional to  $Ca_{cyt}$  (3, 4) (Third term in equation S1)
4. Active  $G\beta\gamma$  undergoes a spatial redistribution (last two terms in equation S1) through a membrane affinity based reversible translocation between plasma membrane and internal membranes (5) (fourth and fifth terms in equation S1). Here  $k_{t1}$  and  $k_{t2}$  represent rate constants for forward (from plasma to internal membrane) and backward (internal to plasma membrane) translocation, respectively.
5. Released  $G\beta\gamma$  mediates PLC- $\beta$  activation. Thus its formation rate is modeled as being proportional to active  $G\beta\gamma$  (first term in equation S3). Further, its removal is quantified using a Michaelis-Menten kinetics which is consistent with Kummer et al. (1).
6. Consistent with Kummer et al, we assumed that the  $Ca^{2+}$  influx to the cytosol is regulated by PLC- $\beta$  mediated IP3 and is modeled as proportional to PLC- $\beta$  (first term in equation

S4). As IP3 is generated by catalysis through active PLC- $\beta$ , the calcium influx from the ER is directly taken to be dependent on PLC- $\beta$ .

7. There is an immediate positive feedback on the calcium influx from ER by the cytosolic calcium itself, CICR (6) (second term in equation S4).
8. The cytosolic  $Ca^{2+}$  fluxes across the plasma membrane are controlled by (i) PLC- $\beta$  mediated IP3 (first term in equation S4) and (ii) ion-pumps at plasma membrane and ER (third and fourth term in equation S4) (7).

$$\frac{d[\beta\gamma_{PM}]}{dt} = K_a([R_0] + [R]) - k_1 \frac{[\beta\gamma_{PM}]}{Km_1 + [\beta\gamma_{PM}]} [PLC - \beta] - k_2 \frac{[Ca_{cyt}][\beta\gamma_{PM}]}{Km_2 + [\beta\gamma_{PM}]} - k_{t1}[\beta\gamma_{PM}] + k_{t2}[\beta\gamma_{fIM}] \quad (S1)$$

$$\frac{d[\beta\gamma_{IM}]}{dt} = k_{t1}[\beta\gamma_{PM}] - k_{t2}[\beta\gamma_{IM}] \quad (S2)$$

$$\frac{d[PLC-\beta]}{dt} = k_3[\beta\gamma_{PM}] - k_4 \frac{[PLC-\beta]}{Km_3 + [PLC-\beta]} \quad (S3)$$

$$\frac{d[Ca_{cyt}]}{dt} = k_5[PLC - \beta] + k_6 \frac{[Ca_{ER}]}{Km_4 + [Ca_{ER}]} [PLC - \beta][Ca_{cyt}] - k_7 \frac{[Ca_{cyt}]}{Km_5 + [Ca_{cyt}]} - k_8 \frac{[Ca_{cyt}]}{Km_6 + [Ca_{cyt}]} \quad (S4)$$

$$\frac{d[Ca_{ER}]}{dt} = -k_6 \frac{[Ca_{ER}]}{Km_4 + [Ca_{ER}]} [PLC - \beta][Ca_{cyt}] + k_8 \frac{[Ca_{cyt}]}{Km_6 + [Ca_{cyt}]} \quad (S5)$$

Parameters and initial conditions chosen for simulation of single  $\gamma$ -subunit model are described in the next section.

## 2.1 Description of Gi mediated calcium oscillation: two $\gamma$ subunit model

To capture the presence of multiple  $\gamma$  subunits with distinct rates of translocation in a particular cell type(8), we incorporated a fast  $\gamma$  subunit ( $\gamma_{fast}$ ) and a slow  $\gamma$  subunit ( $\gamma_{slow}$ ) in the model, both of which are capable of translocation but with distinct translocation rates. The translocation rates, for  $\gamma_{fast}$  and  $\gamma_{slow}$  are  $k_{if}$  and  $k_{ts}$ , where  $k_{if} > k_{ts}$ . It is assumed that both the  $\gamma$  subunits act additively on downstream signaling (activation of PLC- $\beta$ ). The two  $\gamma$  subunit model is presented by the following equations,



$$\begin{aligned} \frac{d[\beta\gamma_{fast_{PM}}]}{dt} = & K_a m_1 ([R_0] + [R]) - k_1 \frac{[\beta\gamma_{fast_{PM}}]}{K m_1 + [\beta\gamma_{fast_{PM}}]} [PLC - \beta] - k_2 \frac{[Ca_{cyt}][\beta\gamma_{fast_{PM}}]}{K m_2 + [\beta\gamma_{fast_{PM}}]} \\ & - k_{tf}([\beta\gamma_{fast_{PM}}] - [\beta\gamma_{fast_{IM}}]) \end{aligned} \quad (S6)$$

$$\begin{aligned} \frac{d[\beta\gamma_{slow_{PM}}]}{dt} = & K_a m_2 ([R_0] + [R]) - k_1 \frac{[\beta\gamma_{slow_{PM}}]}{K m_1 + [\beta\gamma_{slow_{PM}}]} [PLC - \beta] - k_2 \frac{[Ca_{cyt}][\beta\gamma_{slow_{PM}}]}{K m_2 + [\beta\gamma_{slow_{PM}}]} \\ & - k_{ts}([\beta\gamma_{slow_{PM}}] - [\beta\gamma_{slow_{IM}}]) \end{aligned} \quad (S7)$$

$$\frac{d[\beta\gamma_{fast_{IM}}]}{dt} = k_{tf}([\beta\gamma_{fast_{PM}}] - [\beta\gamma_{fast_{IM}}]) \quad (S8)$$

$$\frac{d[\beta\gamma_{slow_{IM}}]}{dt} = k_{ts}([\beta\gamma_{slow_{PM}}] - [\beta\gamma_{slow_{IM}}]) \quad (S9)$$

$$\beta\gamma_{PM} = [\beta\gamma_{fast_{PM}}] + [\beta\gamma_{slow_{PM}}] \quad (S10)$$

The dynamics of  $\beta\gamma$  is presented as the sum of five terms in the equation (S6). The first term indicates the activation rate of the  $\beta\gamma$  complex.  $K_a$  represents the rate of receptor activation with  $R_0$  and  $R$  being the basal and stimulated activated receptor concentration. To account for the effect of varying the ratio,  $\beta\gamma_{fast}:\beta\gamma_{slow}$ , we incorporated a factor  $m_i$  into the activation rate term. If a particular  $\gamma$  subunit concentration is relatively high in a cell then  $m_i$  will be higher for that particular  $\gamma$  subunit because probability of the presence of that  $\gamma$  subunit in the G protein complex is higher.

Here, we assume that the total Gprotein complex at the plasma membrane is in excess and constant irrespective of the amount of  $\gamma$ -subunit. Since experimentally only  $\gamma$ -subunit is over expressed, the assumption states that the  $G_{\alpha\beta}$  complex is limiting and therefore due to the respective type of  $\gamma$ -subunit only the composition of Gprotein complex changes. Thus over expression of a specific type of  $\gamma$ -subunit only changes the composition of the complex of the fast and slow subunits of  $\beta\gamma$  in the model. This formulation assumes a fixed  $G_{\alpha\beta\gamma}$  concentration and depending on the type of  $\gamma$ -subunit (fast or slow), composition will vary. For example for the two  $\gamma$ -subunit model, total G protein, i.e.,  $G_T$  is as follows

$$G_T = (G_{\alpha\beta\gamma_{fast}} + G_{\alpha\beta\gamma_{slow}}) \quad (S11)$$

The activation rate for the  $\beta\gamma_{fast}$  and  $\beta\gamma_{slow}$  are as following

$$\beta\dot{\gamma}_{fast} = K_{a0} * ([R] + [R_0]) * G_{\alpha\beta\gamma_{fast}} \quad (S12)$$

$$\beta\dot{\gamma}_{slow} = K_{a0} * ([R] + [R_0]) * G_{\alpha\beta\gamma_{slow}} \quad (S13)$$

Let  $m1 = G_{\alpha\beta\gamma_{fast}}/G_T$  and  $m2 = G_{\alpha\beta\gamma_{slow}}/G_T$ , corresponds to composition of specific type of Gprotein complex. Hence, following activation rate terms can be written as,

$$\beta\dot{\gamma}_{fast} = K_{a0} * ([R] + [R_0]) * m1 * G_T \quad (S14)$$

$$\beta\dot{\gamma}_{slow} = K_{a0} * ([R] + [R_0]) * m2 * G_T \quad (S16)$$

Let  $K_a = K_{a0} * G_T$  and hence,

$$\beta\dot{\gamma}_{fast} = K_a * m1 * ([R] + [R_0]) \quad \text{and} \quad \beta\dot{\gamma}_{slow} = K_a * m2 * ([R] + [R_0]) \quad (S17)$$

This activation terms are used in the dynamic equations S6 and S7,

It should be noted that,

1.  $m_1 = 0.5, m_2 = 0.5$  represents the case in which both fast and slow subunit have equal levels of expression.
2.  $m_1 = 1$  represents the case of expression of only the fast  $\gamma$ -subunit, (similar to overexpression of fast  $\gamma$ -subunit).
3.  $m_1 = 0$  represents the case of expression of only the slow  $\gamma$  subunit, (similar to knockdown of fast  $\gamma$ -subunit).
4. We assumed  $m_1=0.25$ , and  $m_2=0.75$  to represent the wild type HeLa cells.

The second and third terms (equation S6) are for deactivation of  $\beta\gamma$  complex regulated by PLC- $\beta$  and  $Ca^{2+}$ . The last term in equation S6 captures the effect of reversible translocation. For the two-subunit model, we assumed that both forward and reverse translocation rates follow first order kinetics (5). For the rest of the variables (i.e. PLC- $\beta$ ,  $Ca_{ER}$  and  $Ca_{cyt}$ ) the dynamic equations are the same as those used for the single subunit model.

## 2.2 Initial conditions

To obtain the initial conditions for each of the components in the signaling pathway, we chose a vector of zeros as initial condition and obtained the steady state values for all the

variables. We then chose the vector of steady state values as the initial condition vector for the various simulation cases under consideration.

For demonstration here we present the case of  $m_1= 0.25$ ,  $m_2= 0.75$ . In this case, first we chose the initial condition vector for the two  $\gamma$  subunit ODE model as

$$H_0 = [\beta\gamma_{fast\ PM\_0} \ \beta\gamma_{fast\ IM\_0} \ \beta\gamma_{slow\ PM\_0} \ \beta\gamma_{slow\ IM\_0} \ \text{PLC-}\beta_0 \ \text{Ca}_{cyt\_0} \ \text{Ca}_{ER\_0}] = [0 \ 0 \ 0 \ 0 \ 0 \ 0 \ 0];$$

Then we supplied this initial condition to model and set  $[R] = 0$  to obtain the steady state

$$H_{ss} = [0.0870 \ 0.0870 \ 2.7427 \ 2.7427 \ 30.3761 \ 0.0258 \ 1.9425].$$

This steady state solution was then used as the initial working condition for  $m_1=0.25$ ,  $m_2=0.75$ .

### 2.3. Simulation of the response in a cell population

The  $\text{Ca}^{2+}$  oscillations in cell populations with different proportions of  $\gamma_{fast}$  and  $\gamma_{slow}$  were simulated using our ODE model for two  $\gamma$  subunits as discussed above. We assumed a Gamma distribution of the activation term for  $\beta\gamma$  (for  $K_a$  in Equation S6), that is

$$(F(K_a, k, \theta) = \frac{1}{\theta^k} \frac{1}{\Gamma(k)} K_a^{(k-1)} e^{-(K_a/\theta)}) \text{ with a scale factor } \theta=4 \text{ and shape factors } k=0.25 \text{ (resulting}$$

in a mean,  $\mu=1.0$  and standard deviation,  $\sigma = 0.5$ ). Such a simulation method for obtaining a cell population response based on variations in protein concentration has been used in several computational studies. In order to obtain the death time during apoptosis (response) in a HeLa cell population, Spencer et al., 2009 (9) used a lognormal

distribution  $(F(x, \mu, \sigma) = \frac{1}{x\sigma\sqrt{2\pi}} e^{-\frac{(\ln x - \mu)^2}{2\sigma^2}}, x > 0)$  in the variation of protein concentration (a

parameter in their ODE model). In other studies, Wang et al., 2012(10) used an uniform distribution  $(F(x, a, b) = \frac{1}{b-a}, \text{ or } a < x < b, F(x, a, b) = 0, \text{ for } x < a \text{ and } x > b)$  of the

parameter in their ODE model to obtain the heterogeneous PIP3 response in a *Dictyostelium* population. Ferrell et al 1998 (11) assumed a cumulative distribution function  $(F(K, m, a) =$

$\frac{K^m}{a^m + K^m})$  in the half saturation constant (K) of the hormone concentration (a parameter in their

ODE model) to study the MAPK response and on-off maturation state in a *Xenopus* oocyte population.

## References

1. Kummer, U., L. F. Olsen, C. J. Dixon, A. K. Green, E. Bornberg-Bauer, and G. Baier. 2000. Switching from Simple to Complex Oscillations in Calcium Signaling. *Biophys J.* 79:1188-1195.
2. Bourne, H. R., and L. Stryer. 1992. The target sets the tempo. *Nature* 358:541-543.
3. Kawabata, S., R. Tsutsumi, A. Kohara, T. Yamaguchi, S. Nakanishi, and M. Okada. 1996. Control of calcium oscillations by phosphorylation of metabotropic glutamate receptors. *Nature* 383:89-92.
4. Oancea, E., and T. Meyer. 1998. Protein Kinase C as a Molecular Machine for Decoding Calcium and Diacylglycerol Signals. *Cell* 95:307-318.
5. O'Neill, P. R., W. K. Karunarathne, V. Kalyanaraman, J. R. Silvius, and N. Gautam. 2012. G-protein signaling leverages subunit-dependent membrane affinity to differentially control betagamma translocation to intracellular membranes. *Proc Natl Acad Sci U S A* 109:E3568-3577.
6. Berridge, M. J. 1993. Inositol trisphosphate and calcium signalling. *Nature* 361:315-325.
7. Pietrobon, D., F. Di Virgilio, and T. Pozzan. 1990. Structural and functional aspects of calcium homeostasis in eukaryotic cells. *Eur J Biochem* 193:599-622.
8. Ajith Karunarathne, W. K., P. R. O'Neill, P. L. Martinez-Espinosa, V. Kalyanaraman, and N. Gautam. 2012. All G protein  $\beta\gamma$  complexes are capable of translocation on receptor activation. *Biochem Biophys Res Commun* 421:605-611.
9. Spencer, S. L., S. Gaudet, J. G. Albeck, J. M. Burke, and P. K. Sorger. 2009. Non-genetic origins of cell-to-cell variability in TRAIL-induced apoptosis. *Nature* 459:428-432.
10. Wang, C. J., A. Bergmann, B. Lin, K. Kim, and A. Levchenko. 2012. Diverse Sensitivity Thresholds in Dynamic Signaling Responses by Social Amoebae. *Sci. Signal.* 28;5(213):ra17.
11. Machleder, J. E. F. J. a. E. M. 1998. The Biochemical Basis of an All-or-None Cell Fate Switch in *Xenopus* Oocytes. *Science* 280:3.

a

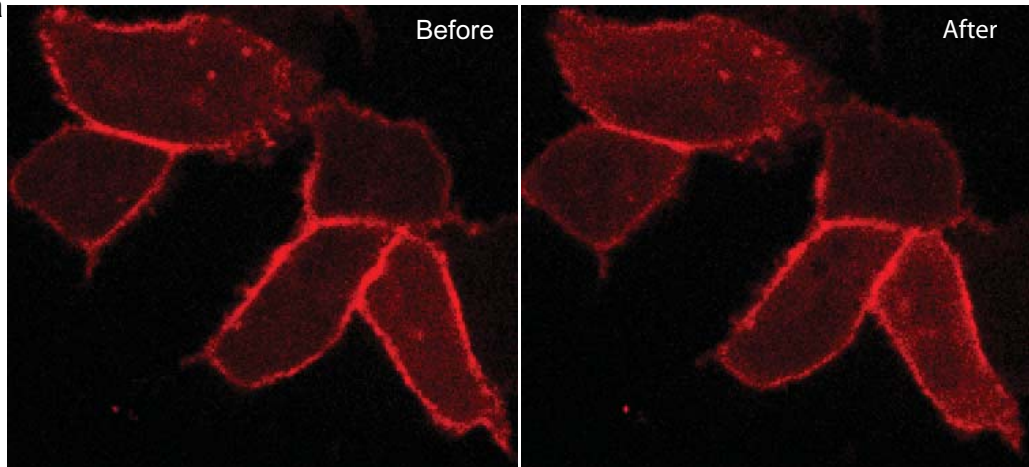

b

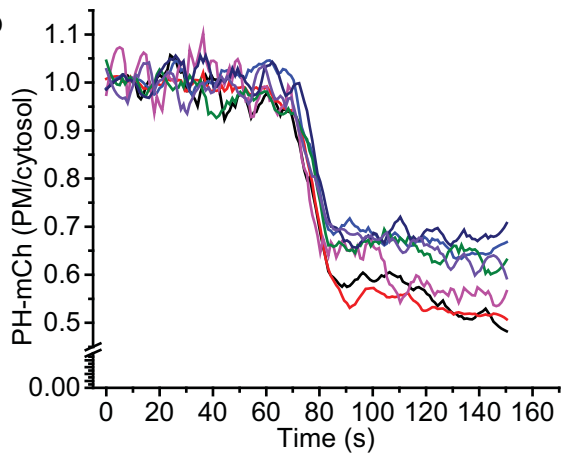

**a**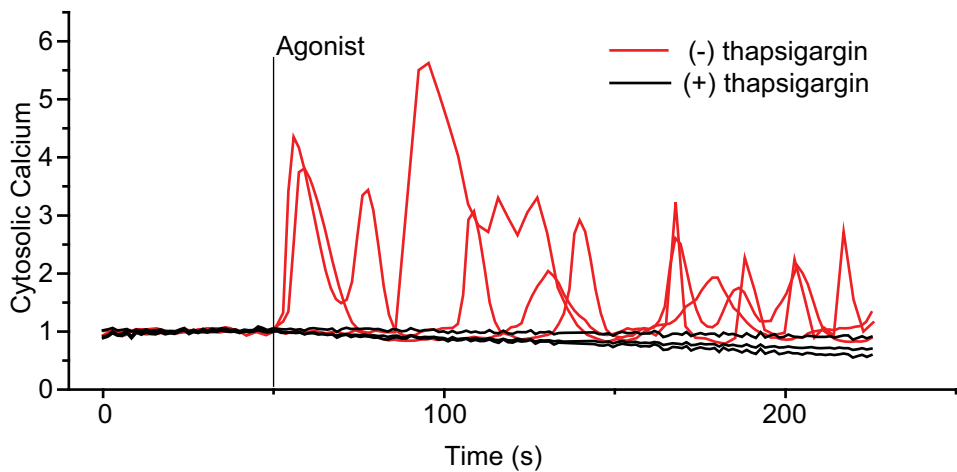**b**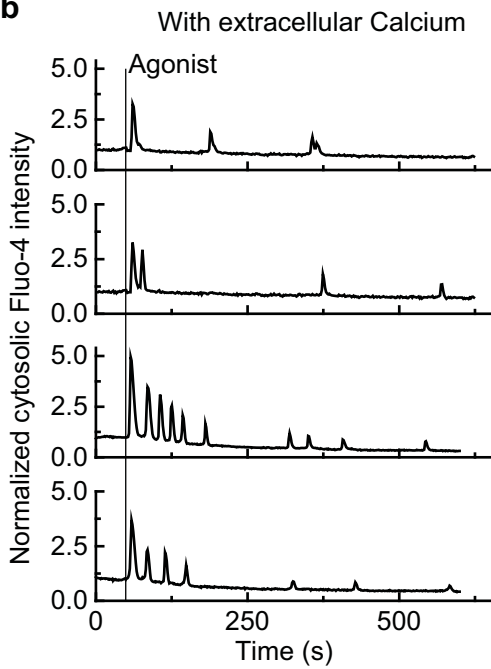**c**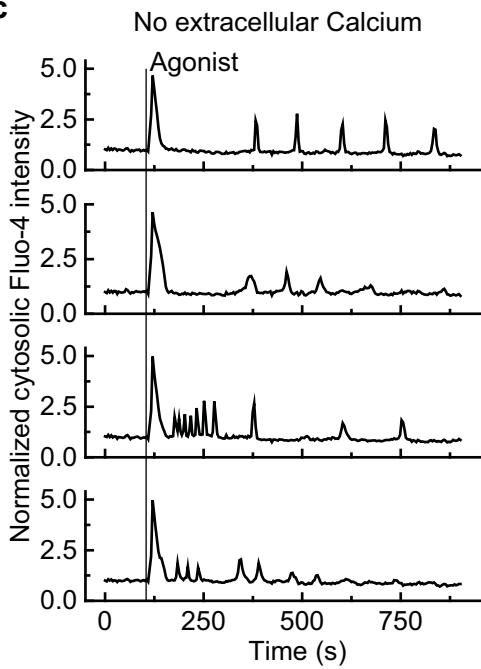

a

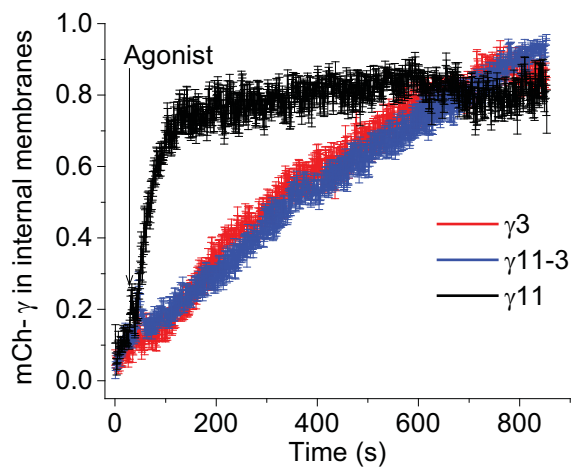

b

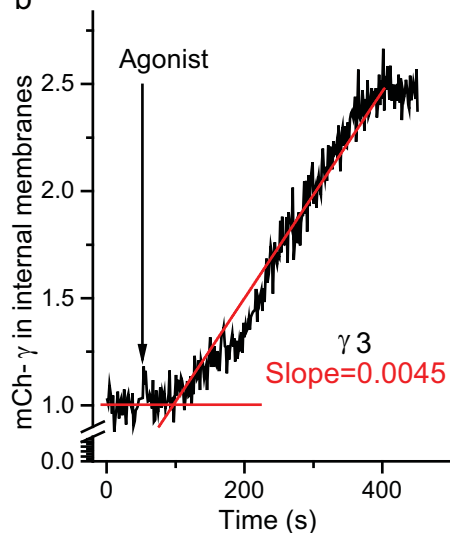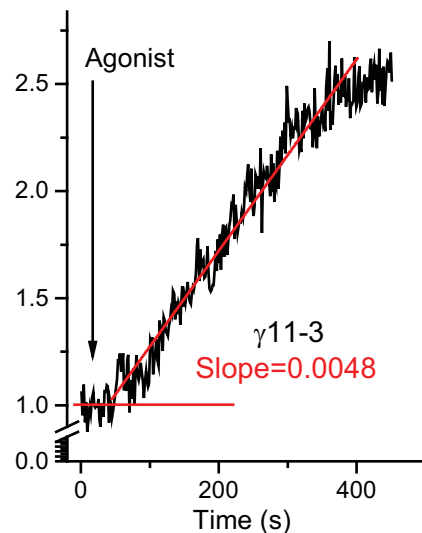

c

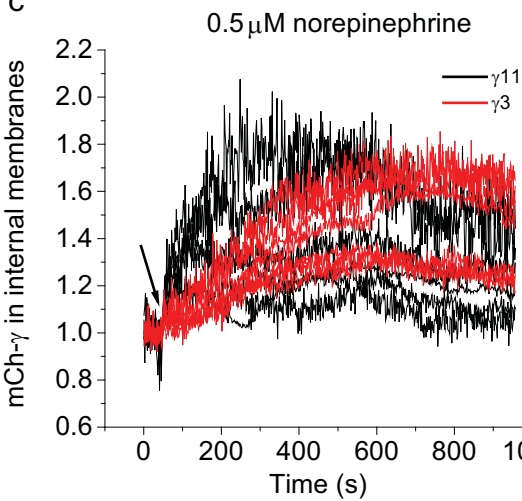

d

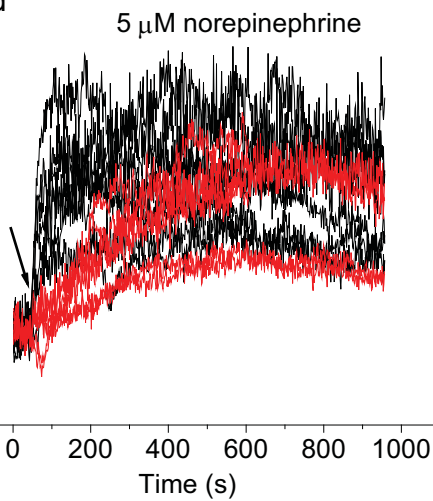

e

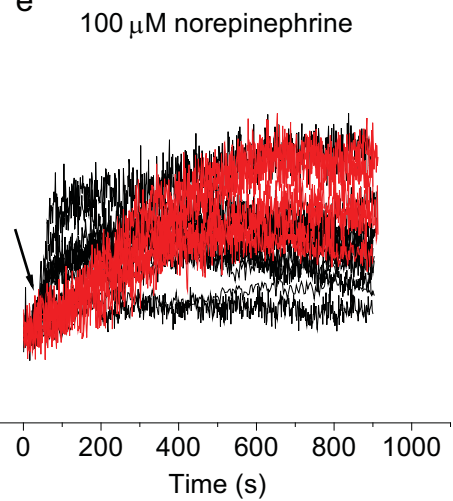

f

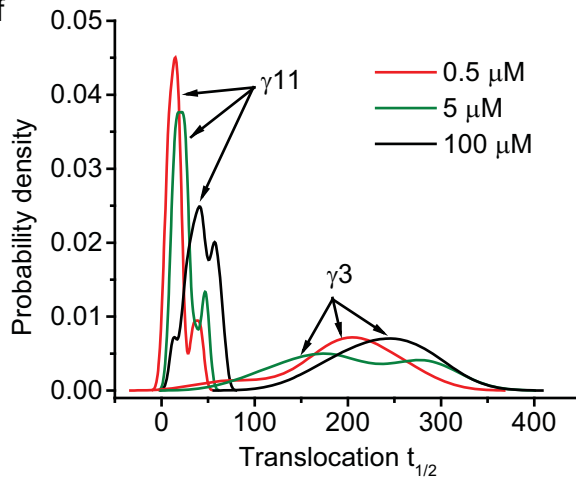

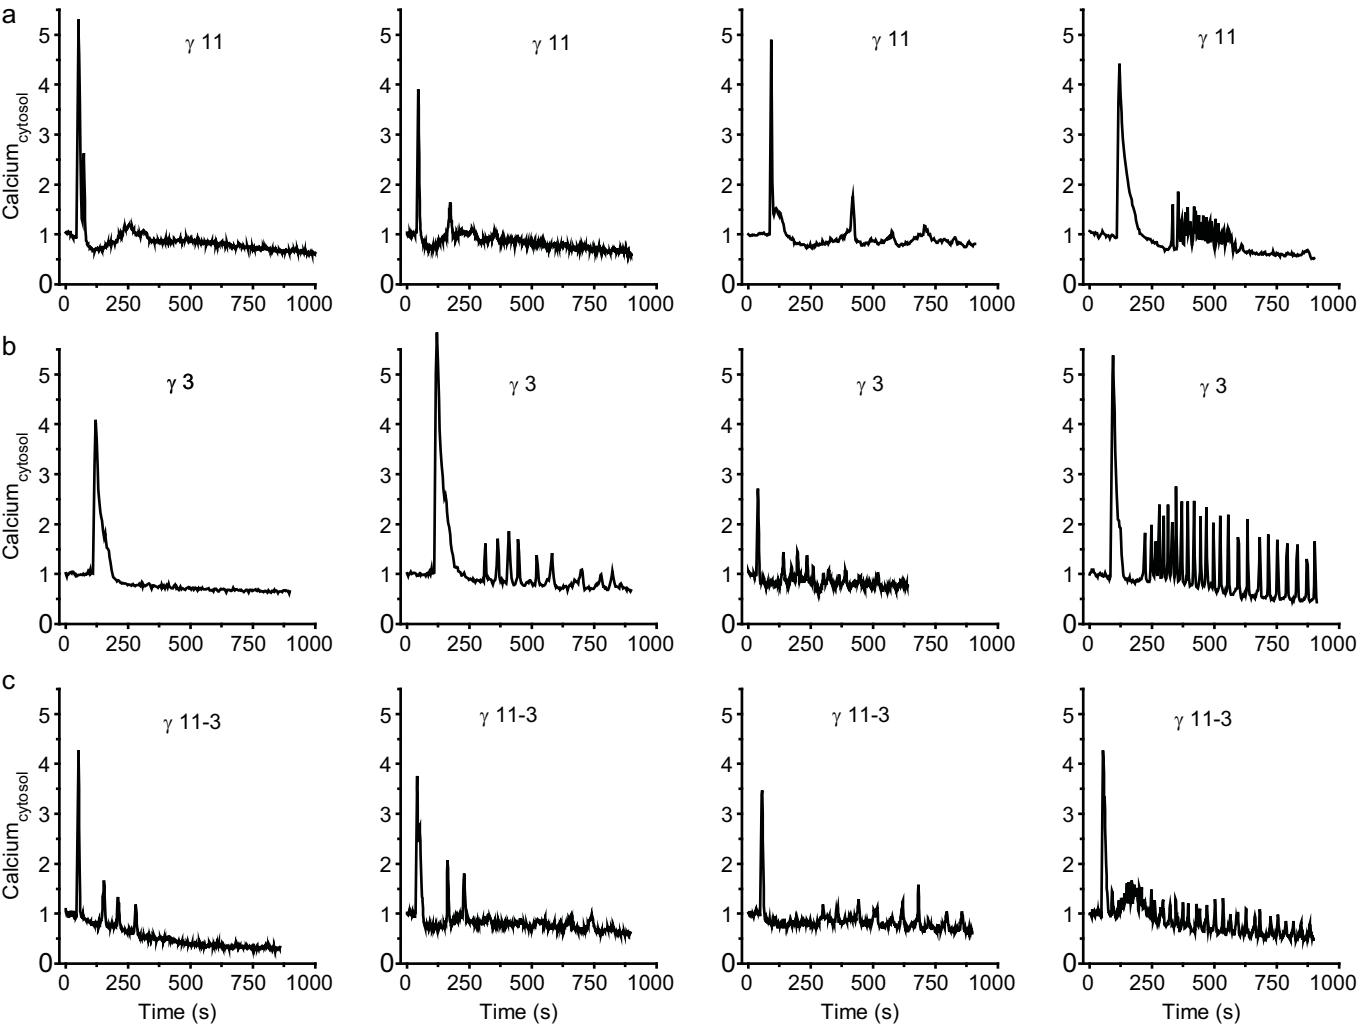



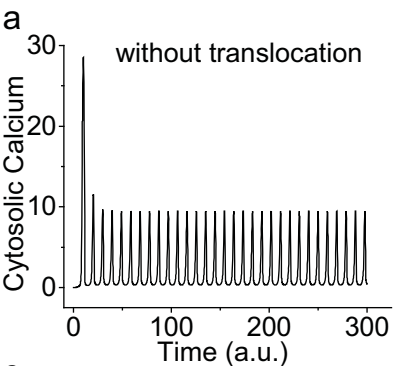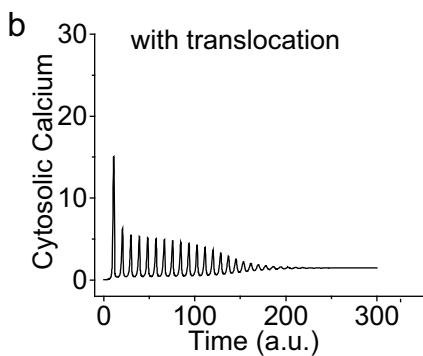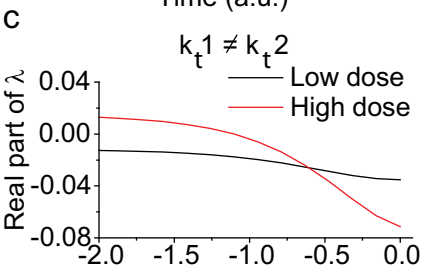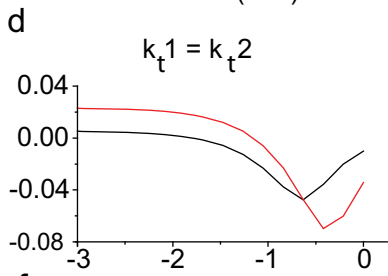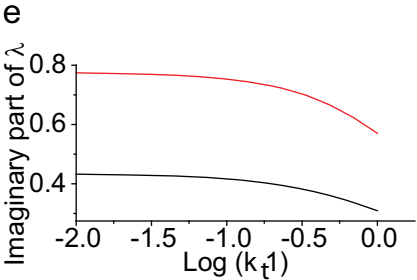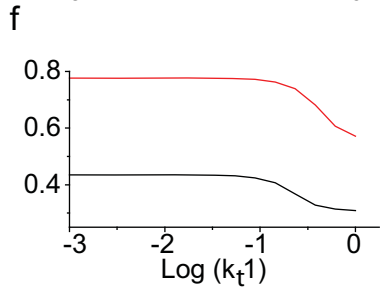

a

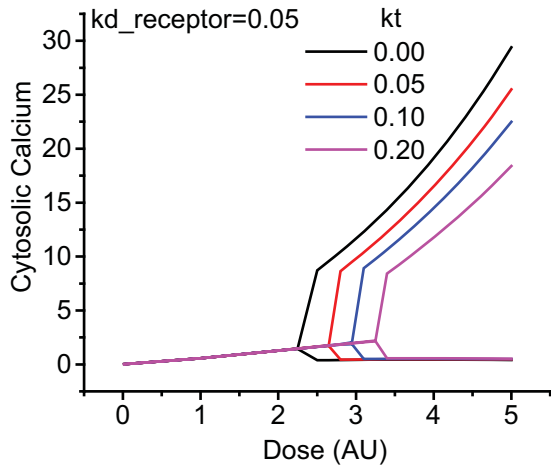

b

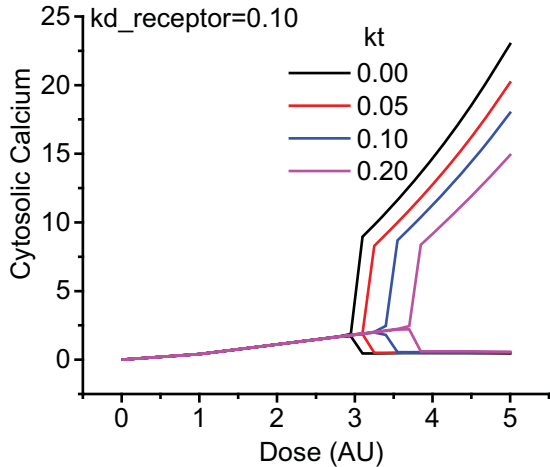

**a** $k_2 =$  negative feedback on receptor through cytosolic calcium  $= 1.45$ 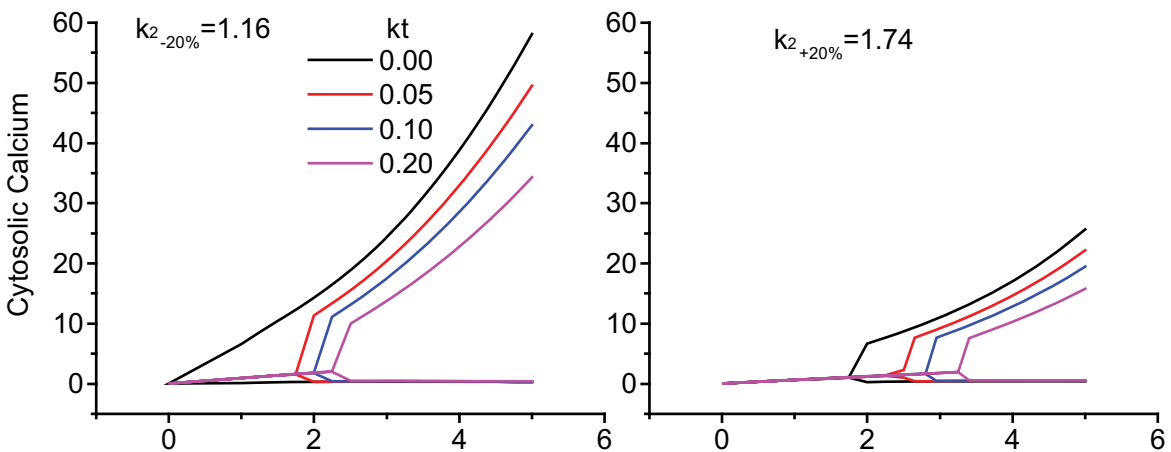**b** $k_5 =$  rate constant for calcium flux from ER through PLC- $\beta$  mediated IP $_3$  activation  $= 5.00$ 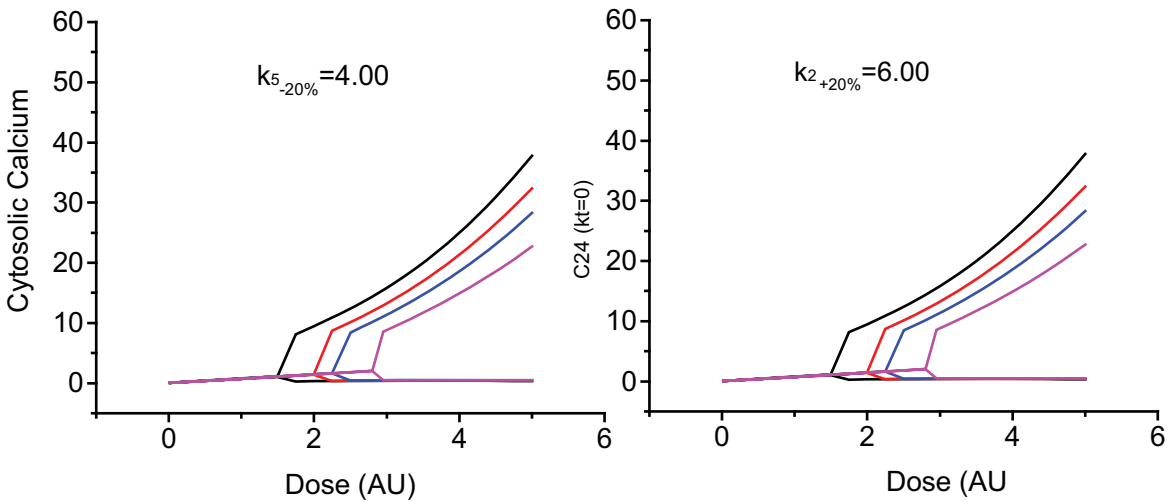

a

Experimental

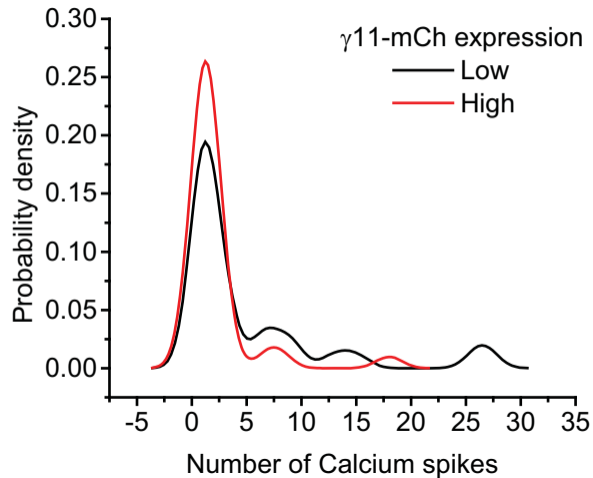

b

Simulations

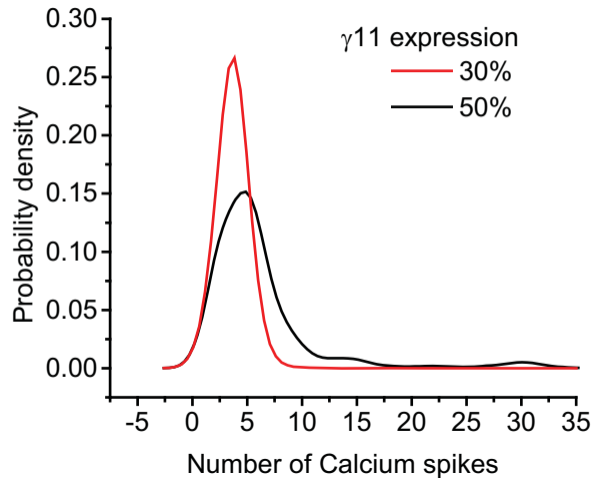

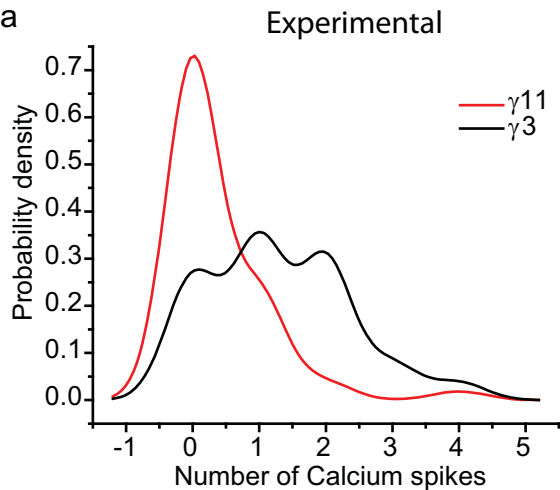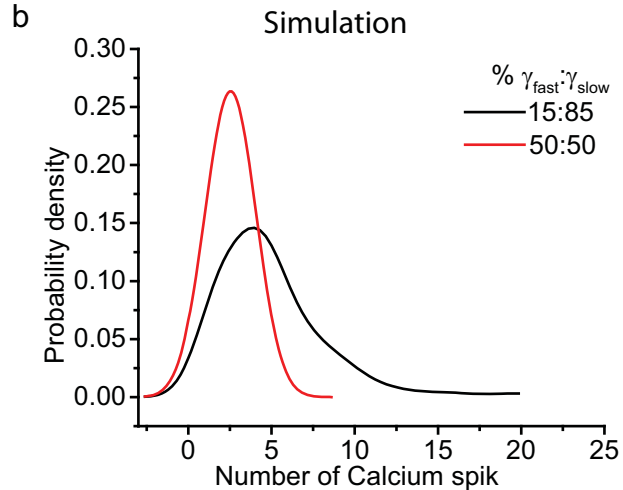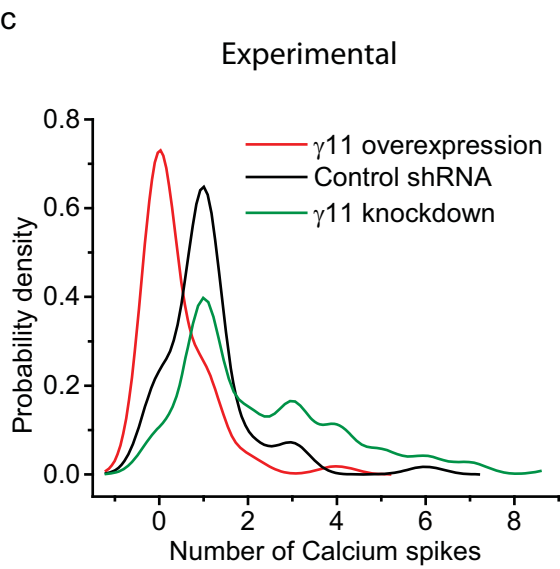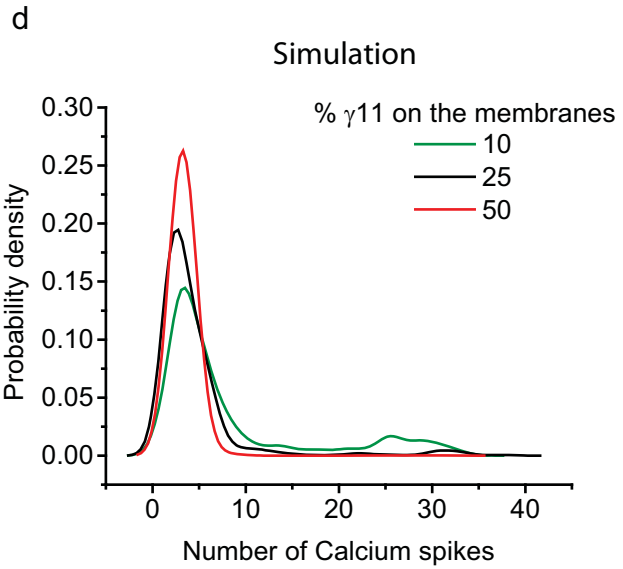

## Supplementary figure legends

**Fig. S1.** Activation of  $\alpha 2$ -adrenergic receptor using norepinephrine induces IP3 production. (a) HeLa cells transfected with PLC- $\delta$  PH domain tagged with mCherry showed translocation from plasma membrane to cytosol. (b) Plot shows the ratio PH-mCh  $PM/PH\text{-mCh cytoplasm}$  ( $N_{\text{exp}}=4$ ).

Figure S2 : Stimulation through norepinephrine induces intracellular calcium release in HeLa cells (a) Calcium dynamics in HeLa cells in presence of a blocker of sarcoplasmic reticulum  $\text{Ca}^{2+}$ -ATPase pump (thapsigargin = 120 nM). Black- three representative cells treated with thapsigargin; Red – Three representative cells not treated with thapsigargin (b) Calcium oscillation in 4 representative HeLa cells in presence of calcium in medium (HBSS) (c) Calcium oscillation in 4 representative HeLa cells in absence of calcium in medium (HBSS). We found HeLa cells show calcium oscillation even without calcium in medium. ( $N_{\text{exp}}=6$ )

**Fig. S3.** Characterization of the translocation rate of  $\gamma 11$ ,  $\gamma 3$  and  $\gamma 11\text{-}3$ . (a) Comparison of the translocation dynamics for  $\gamma 11$ ,  $\gamma 3$  and  $\gamma 11\text{-}3$ .  $\gamma 3$  (red), 5 cells  $\gamma 11\text{-}3$  (blue), 5 cells;  $\gamma 11$  (black), 6 cells. Error bars: +/- SEM. Note that the  $\gamma 11\text{-}3$  chimera shows similar slower translocation kinetics as  $\gamma 3$ . (b) Activation of alpha-2 adrenergic receptor using norepinephrine is associated with a change in slope in  $\gamma 3$  and  $\gamma 11\text{-}3$  signal in internal membranes. ( $N_{\text{exp}}=30$ ). (c) Translocation profile for  $\gamma 11$  and  $\gamma 3$  at 0.5  $\mu\text{M}$  norepinephrine (d) Translocation profile for  $\gamma 11$  and  $\gamma 3$  at 5  $\mu\text{M}$  norepinephrine (e) Translocation profile for  $\gamma 11$  and  $\gamma 3$  at 100  $\mu\text{M}$  norepinephrine. (f) Comparison of the translocation speed distribution in cell populations at 3 different agonist concentrations (0.5, 5 and 100  $\mu\text{M}$ ) for  $\gamma 11$  and  $\gamma 3$ . Here the translocation rate is defined as the time to reach half of the maximum  $G\gamma$  signal intensity in internal membranes. Plots show the translocation profiles of  $\gamma 11$  and  $\gamma 3$  at different concentrations. ( $n$  = number of cells in a population = 30). ( $N_{\text{exp}}=6$ ).

Figure S4.  $\text{Ca}^{2+}$  oscillations in four cells, each from a population expressing a specific  $\gamma$  subunit type. Note that there is cell to cell variability in the spiking pattern within a population expressing a specific  $\gamma$  subunit type. ( $N_{\text{exp}}=3$ )

Figure S5. Computational analysis of  $\gamma$ -translocation rate in the regulation of Gi mediated  $\text{Ca}^{2+}$  oscillation at different drug doses (*in silico* analysis from single  $\gamma$ -subunit model). (a) Simulated

time course of  $Ca^{2+}$  oscillation in the absence of  $\beta\gamma$  translocation (i.e.,  $k_{t1} = k_{t2} = 0$  in single subunit model) demonstrating sustained oscillations.  $k_{t1}$  is the rate constant for forward translocation of  $\beta\gamma$  from plasma membrane to internal membranes.  $k_{t2}$  is the backward rate constant. Time (x axis) is in arbitrary units. (b) Simulated time-course of  $Ca^{2+}$  oscillations in the presence of  $\beta\gamma$  translocation yielding damped response. (c), (d) Damping of  $Ca^{2+}$  oscillations (real part of Eigenvalue) as a function of  $\beta\gamma$  translocation rate at low and high drug-doses. (c)  $k_{t1} \neq k_{t2}$  and (d)  $k_{t1} = k_{t2}$ . (e), (f) Frequency of  $Ca^{2+}$  oscillation (imaginary part of Eigenvalue) as a function of  $\beta\gamma$  translocation rate ( $k_{t1}$ ) at lower and higher drug-doses. (e)  $k_{t1} \neq k_{t2}$ , (f)  $k_{t1} = k_{t2}$ . Note that for conditions  $k_{t1} \neq k_{t2}$  and  $k_{t1} = k_{t2}$ , the qualitative behavior of eigenvalues is similar.

**Fig. S6.** The effect of translocation ( $k_t$ ) on calcium concentration remains similar when receptor endocytosis is included in the model. (a) Steady state cytosolic calcium concentration (arbitrary units) as a function of agonist concentration for different translocation rates ( $k_t = 0$ ,  $k_t = 0.05$ ,  $k_t = 0.1$ ,  $k_t = 5$ ) at  $kd\_receptor = 0.05$ . (b) Steady state cytosolic calcium concentration (arbitrary units) as a function of agonist concentration for different translocation rates ( $k_t$ ) at  $kd\_receptor = 0.1$ . Here,  $k_t =$  translocation rate;  $kd\_receptor =$  receptor endocytosis rate. Note that the trend obtained for bifurcation plot from the simulation of the model with receptor endocytosis is comparable to the results from the model without receptor endocytosis (see Fig. 7a).

**Fig. S7.** Sensitivity analysis of the rate constants for the calcium model. (a) Sensitivity analysis of  $k_2$  ( $k_2 =$  negative feedback on receptor through cytosolic calcium),  $k_{2-20\%} = 1.16$ ,  $k_{2+20\%} = 1.74$  (b) Sensitivity analysis of  $k_5$  ( $k_5 =$  rate constant for calcium flux from ER through PLC- $\beta$  mediated IP3 activation),  $k_{5-20\%} = 4$ ,  $k_{5+20\%} = 6$  Left panel = 20% decrease in parameter value; Right panel = 20% increase in parameter value. The result shows that the effect of translocation on calcium oscillation is not valid for only one set of parameters but the trend remains comparable for different choices of parameters.

**Fig. S8.** Comparison of the experiment and simulation results for the dependence of Calcium oscillations on the ratio  $\gamma_{fast} : \gamma_{slow}$  in a cell population. (a) Probability density distribution of number of calcium spikes at different proportions of  $\gamma_{fast}$  from experiments (b) Probability density distribution of number of calcium spikes at different proportions (30% and 50%) of  $\gamma_{fast}$  from simulations. Since the transiently transfected cells show intrinsic variation in  $\gamma_{11}$  expression levels (reflected by the mcherry intensity level), we grouped the cells into low (*mch-  $\gamma_{11}$  intensity*

*level = 1.5-5*), and high (*mch-  $\gamma$ 11 intensity level > 10*) expression levels to evaluate the dependence of the ratio  $\gamma_{fast}:\gamma_{slow}$  on calcium oscillation. The trend obtained from experimental data matches simulation results from the model. ( $n$  = number of cells in population = 30,  $N_{exp}$  = 3).

**Fig. S9.** Characteristics of calcium oscillation distribution in a cell population depends on  $\gamma_{fast}:\gamma_{slow}$  (obtained through  $\gamma$ 11 expression,  $\gamma$ 3 expression and  $\gamma$ 11 knockdown) at lower agonist concentrations (norepinephrine concentration = 0.5  $\mu$ M). We also compared these with simulation results to show that the experimental result matches the simulations from the model. (a) Comparison of the distribution of number of calcium spikes in mCh- $\gamma$ 11, and mCh- $\gamma$ 3 transfected cell populations at dose = 0.5  $\mu$ M from experiment (b) Comparison of the distribution of number of calcium spikes in cell population with 50%  $\gamma_{fast}$  (corresponding to  $\gamma$ 11 expression) and 15%  $\gamma_{fast}$  (corresponding to  $\gamma$ 3) at lower dose ( $k_1=0.75$ ) from simulation, (c) Comparison of the distribution of number of calcium spikes in mCh- $\gamma$ 11 transfected, control shRNA and  $\gamma$ 11 knockdown cell population at dose = 0.5  $\mu$ M from experiment, (d) Comparison of the distribution of number of calcium spikes in cell population with 50%  $\gamma_{fast}$  (corresponding to  $\gamma$ 11 expression), 25%  $\gamma_{fast}$  (corresponding to control shRNA HeLa cells) and 10%  $\gamma_{fast}$  (corresponding to  $\gamma$ 11 knockdown) at lower dose ( $k_1=0.75$ ) from simulation. ( $n$  = number of cells in a population = 30,  $N_{exp}$  = 3).



## Supplementary movie legends

Movie S1:  $\text{Ca}^{2+}$  oscillation in HeLa cells with higher  $\gamma_{\text{fast}}:\gamma_{\text{slow}}$  (overexpression of  $\gamma_{11}$ , fast translocating subunit). Cells here and below were transfected with  $\gamma_{11}$ -mCh (red) and incubated with Fluo-4 (green) to monitor  $\text{Ca}^{2+}$  response.

Movie S2:  $\alpha 2\text{AR}$  mediated  $\text{Ca}^{2+}$  oscillation in HeLa cells with lower  $\gamma_{\text{fast}}:\gamma_{\text{slow}}$  (overexpression of  $\gamma_3$ , slow translocating subunit).

Movie S3:  $\alpha 2\text{AR}$  mediated  $\text{Ca}^{2+}$  oscillation in HeLa cells with lower  $\gamma_{\text{fast}}:\gamma_{\text{slow}}$  (Introduction of chimeric  $\gamma_{11-3}$ , slow translocating subunit).

Movie S4:  $\alpha 2\text{AR}$  mediated  $\text{Ca}^{2+}$  oscillation in HeLa cells transfected with a control shRNA.

Movie S5:  $\alpha 2\text{AR}$  mediated  $\text{Ca}^{2+}$  oscillation in  $\gamma_{11}$  knockdown HeLa cells.

**Table S1: Comparison of statistical parameters for the distribution of calcium oscillation characteristics between mch  $\gamma$ 11, mch  $\gamma$ 3 and mch  $\gamma$ 11–3 transfected HeLa cell populations.**

| <b>Number of Ca<sup>+</sup> spikes (N)</b> | $\gamma$ 11 | $\gamma$ 3 | $\gamma$ 11–3 | <b>Duration Ca<sup>+</sup> oscillation (T) (Sec)</b> | $\gamma$ 11 | $\gamma$ 3 | $\gamma$ 11–3 |
|--------------------------------------------|-------------|------------|---------------|------------------------------------------------------|-------------|------------|---------------|
| <b>Mean</b>                                | 3.6         | 5.3        | 5.1           | <b>Mean</b>                                          | 230.81      | 369.51     | 416.0         |
| <b>Median</b>                              | 1           | 3          | 3             | <b>Median</b>                                        | 160         | 280        | 360           |
| <b>SD</b>                                  | 5.4         | 6.26       | 7.67          | <b>SD</b>                                            | 252.75      | 286.46     | 264.68        |
| <b>Variance</b>                            | 29.36       | 39.84      | 57.72         | <b>Variance</b>                                      | 63995       | 84079      | 70559         |
| <b>% of population showing N &lt;3</b>     | 70%         | 49%        | 55%           | <b>% of population showing 0&lt;T&lt;100</b>         | 47          | 22         | 13            |

**Table S2: List of parameter values used for simulation from the single and two-subunit models**

The unit of the concentration/activity is arbitrary (AU).

| <b>Parameter</b> | <b>Value</b>   | <b>Unit</b>                         |
|------------------|----------------|-------------------------------------|
| $K_a$            | 1.0            | $[\text{Second}]^{-1}$              |
| $k_{t1}$         | 0.001 to 0.500 | $[\text{Second}]^{-1}$              |
| $k_{t2}$         | 0.001 to 0.500 | $[\text{Second}]^{-1}$              |
| $k_{tf}$         | 0.50           | $[\text{Second}]^{-1}$              |
| $k_{ts}$         | 0.02           | $[\text{Second}]^{-1}$              |
| $m_1$ and $m_2$  | 0.00 to 1.00   | Dimension less                      |
| $[R_0]$          | 0.05           | AU                                  |
| $k_1$            | 0.0001         | AU/Second                           |
| $k_2$            | 1.45           | $[\text{Second}]^{-1}$              |
| $k_3$            | 5.82           | $[\text{Second}]^{-1}$              |
| $k_4$            | 32.24          | AU/Second                           |
| $k_5$            | 0.70           | $[\text{Second}]^{-1}$              |
| $k_6$            | 5.00           | $1/(\text{AU} \cdot \text{Second})$ |
| $k_7$            | 153.00         | AU/Second                           |
| $k_8$            | 4.85           | AU/Second                           |
| $Km_1$           | 0.788          | AU                                  |
| $Km_2$           | 0.18           | AU                                  |
| $Km_3$           | 29.09          | AU                                  |
| $Km_4$           | 2.67           | AU                                  |
| $Km_5$           | 0.16           | AU                                  |
| $Km_6$           | 0.05           | AU                                  |

Note that for generating responses as shown in various figures the activated receptor concentration  $[R]$  was assumed to be 2.0, 1.5 and 1 for high, medium and low doses, respectively.

**Table S3: Comparison of statistical parameters for the distribution of calcium spiking number between  $\gamma$ 11 knockdown, control shRNA and mch- $\gamma$ 11 transfected HeLa cell population**

| <b>Number of Ca<sup>+</sup> spikes</b> | <b><math>\gamma</math>11 knockdown</b> | <b>Control shRNA</b> | <b><math>\gamma</math>11 transfected</b> |
|----------------------------------------|----------------------------------------|----------------------|------------------------------------------|
| <b>Mean</b>                            | 8.2                                    | 4.67                 | 3.6                                      |
| <b>Median</b>                          | 8                                      | 3.5                  | 1                                        |
| <b>Mode</b>                            | 8.8                                    | 7                    | 1                                        |
| <b>Variance of dominant mode</b>       | 13.8                                   | 11.0                 | 5.8                                      |
| <b>% of population showing N&lt;3</b>  | 17%                                    | 40.9%                | 70%                                      |
